# Supplementary material for: Investigations on Synperiplanar and Antiperiplanar Isomers of Losartan: Theoretical and Experimental NMR Studies
Source: PubMed Central journal article supplement (PMC6332005; doi:10.3390/molecules200711875), 2015-06-29
Supplement: molecules-20-11875-s001.pdf [file molecules-20-11875-s001.pdf]

## Supplementary Materials

The NMR signals were calculated at 293 K. Experimental data are given in the experimental section.

**Table S1.** Calculated and experimental data for losartan anion (**1**) Rotamer **I** (isomer *syn*); the following parameters were determined for their proton groups: experimental (Exp.) and calculated values of the chemical shifts (**I**), absolute errors ( $\delta 1$ ) and values of the relative percentage errors (**E**); calculated NMR shielding for proton  $H^{\text{ref}} = 31.755$  ppm for TMS (B3LYP/6-31G(d,p)/GIAO/gas;  $R^2 = 0.71$ , MAD = 0.76.

| Proton Signals | Exp.  | Vacuum   |            |          |
|----------------|-------|----------|------------|----------|
|                |       | <b>I</b> | $\delta 1$ | <b>E</b> |
| A              | 0.826 | 1.592    | 0.766      | 93       |
| B              | 1.270 | 1.278    | 0.008      | 1        |
| C              | 1.497 | 1.718    | 0.221      | 15       |
| D              | 2.515 | 2.407    | 0.108      | 4        |
| E              | 4.328 | 4.386    | 0.058      | 1        |
| OH             | 5.304 | 0.263    | 5.041      | 95       |
| F              | 5.228 | 5.010    | 0.217      | 4        |
| G              | 6.917 | 6.881    | 0.035      | 1        |
| H              | 7.108 | 7.473    | 0.364      | 5        |
| I              | 7.553 | 8.966    | 1.413      | 19       |
| J              | 7.370 | 6.883    | 0.487      | 7        |
| K              | 7.293 | 6.836    | 0.458      | 6        |

**Table S1b.** Calculated and experimental data for losartan anion (**1**) Rotamer **Ib** (isomer *syn*); the following parameters were determined for their proton groups: experimental (Exp.) and calculated values of the chemical shifts (**Ib**), absolute errors ( $\delta 1b$ ) and values of the relative percentage errors (**E**); calculated NMR shielding for proton  $H^{\text{ref}} = 31.7396$  ppm for TMS (B3LYP/6-31G(d,p)/GIAO/CPCM/DMSO;  $R^2 = 0.73$ , MAD = 0.58.

| Proton Signals | Exp.  | DMSO      |             |          |
|----------------|-------|-----------|-------------|----------|
|                |       | <b>Ib</b> | $\delta 1b$ | <b>E</b> |
| A              | 0.826 | 0.956     | 0.130       | 16       |
| B              | 1.270 | 1.383     | 0.113       | 9        |
| C              | 1.497 | 1.307     | 0.189       | 13       |
| D              | 2.515 | 2.561     | 0.046       | 2        |
| E              | 4.328 | 4.452     | 0.124       | 3        |
| OH             | 5.304 | 0.031     | 5.273       | 99       |
| F              | 5.228 | 5.211     | 0.017       | 0        |
| G              | 6.917 | 7.098     | 0.181       | 3        |
| H              | 7.108 | 7.278     | 0.169       | 2        |
| I              | 7.553 | 7.966     | 0.413       | 5        |
| J              | 7.370 | 7.531     | 0.161       | 2        |
| K              | 7.293 | 7.417     | 0.124       | 2        |

**Table S2.** Calculated and experimental data for losartan anion (**1**) Rotamer **III** (isomer *syn*); the following parameters were determined for their proton groups: experimental (Exp.) and calculated values of the chemical shifts (III), absolute errors ( $\delta 3$ ) and values of the relative percentage errors (E); calculated NMR shielding for proton  $H^{\text{ref}} = 31.984$  ppm for TMS (B3LYP/6-311+G(d,p)/GIAO/gas;  $R^2 = 0.74$ , MAD = 0.74.

| Proton Signals | Exp.  | Vacuum |            |    |
|----------------|-------|--------|------------|----|
|                |       | III    | $\delta 3$ | E  |
| A              | 0.826 | 1.538  | 0.712      | 86 |
| B              | 1.270 | 1.297  | 0.027      | 2  |
| C              | 1.497 | 1.601  | 0.104      | 7  |
| D              | 2.515 | 2.555  | 0.039      | 2  |
| E              | 4.328 | 4.385  | 0.057      | 1  |
| OH             | 5.304 | 0.455  | 4.849      | 91 |
| F              | 5.228 | 5.140  | 0.087      | 2  |
| G              | 6.917 | 8.003  | 1.086      | 16 |
| H              | 7.108 | 7.470  | 0.362      | 5  |
| I              | 7.553 | 8.811  | 1.257      | 17 |
| J              | 7.370 | 7.158  | 0.212      | 3  |
| K              | 7.293 | 7.218  | 0.075      | 1  |

**Table S3.** Calculated and experimental data for losartan anion (**1**) Rotamer **IV** (isomer *syn*); the following parameters were determined for their proton groups: experimental (Exp.) and calculated values of the chemical shifts (IV), absolute errors ( $\delta 4$ ) and values of the relative percentage errors (E); calculated NMR shielding for proton  $H^{\text{ref}} = 31.975$  ppm for TMS (B3LYP/6-311+G(d,p)/GIAO/CPCM;  $R^2 = 0.75$ , MAD = 0.65.

| Proton Signals | Exp.  | Water |            |    |
|----------------|-------|-------|------------|----|
|                |       | IV    | $\delta 4$ | E  |
| A              | 0.826 | 0.960 | 0.134      | 16 |
| B              | 1.270 | 1.432 | 0.162      | 13 |
| C              | 1.497 | 1.408 | 0.088      | 6  |
| D              | 2.515 | 2.719 | 0.204      | 8  |
| E              | 4.328 | 4.302 | 0.026      | 1  |
| OH             | 5.304 | 0.196 | 5.108      | 96 |
| F              | 5.228 | 5.200 | 0.028      | 1  |
| G              | 6.917 | 7.327 | 0.410      | 6  |
| H              | 7.108 | 7.451 | 0.343      | 5  |
| I              | 7.553 | 7.951 | 0.398      | 5  |
| J              | 7.370 | 7.810 | 0.440      | 6  |
| K              | 7.293 | 7.751 | 0.458      | 6  |

**Table S4.** Calculated and experimental data for losartan anion (**1**) Rotamer **V** (isomer *syn*); the following parameters were determined for their proton groups: experimental (Exp.) and calculated values of the chemical shifts (V), absolute errors ( $\delta 5$ ) and values of the relative percentage errors (E); calculated NMR shielding for proton  $H^{\text{ref}} = 31.775$  ppm for TMS (CAM-B3LYP/6-31G(d,p)/GIAO/gas;  $R^2 = 0.72$ , MAD = 0.77.

| Proton Signals | Exp.  | Vacuum |            |     |
|----------------|-------|--------|------------|-----|
|                |       | V      | $\delta 5$ | E   |
| A              | 0.826 | 1.654  | 0.828      | 100 |
| B              | 1.270 | 1.246  | 0.024      | 2   |
| C              | 1.497 | 1.708  | 0.212      | 14  |
| D              | 2.515 | 2.390  | 0.125      | 5   |
| E              | 4.328 | 4.363  | 0.035      | 1   |
| OH             | 5.304 | 0.309  | 4.995      | 94  |
| F              | 5.228 | 4.984  | 0.244      | 5   |
| G              | 6.917 | 7.014  | 0.097      | 1   |
| H              | 7.108 | 7.557  | 0.449      | 6   |
| I              | 7.553 | 9.154  | 1.601      | 21  |
| J              | 7.370 | 7.051  | 0.319      | 4   |
| K              | 7.293 | 7.009  | 0.285      | 4   |

**Table S5.** Calculated and experimental data for losartan anion (**1**) Rotamer **VI** (isomer *syn*); the following parameters were determined for their proton groups: experimental (Exp.) and calculated values of the chemical shifts (VI), absolute errors ( $\delta 6$ ) and values of the relative percentage errors (E); calculated NMR shielding for proton  $H^{\text{ref}} = 31.757$  ppm for TMS (CAM-B3LYP/6-31G(d,p)/GIAO/CPCM;  $R^2 = 0.74$ , MAD = 0.63.

| Proton Signals | Exp.  | Water |            |     |
|----------------|-------|-------|------------|-----|
|                |       | VI    | $\delta 6$ | E   |
| A              | 0.826 | 0.996 | 0.170      | 21  |
| B              | 1.270 | 1.366 | 0.096      | 8   |
| C              | 1.497 | 1.273 | 0.224      | 15  |
| D              | 2.515 | 2.540 | 0.024      | 1   |
| E              | 4.328 | 4.452 | 0.123      | 3   |
| OH             | 5.304 | 0.005 | 5.299      | 100 |
| F              | 5.228 | 5.182 | 0.046      | 1   |
| G              | 6.917 | 7.188 | 0.271      | 4   |
| H              | 7.108 | 7.373 | 0.265      | 4   |
| I              | 7.553 | 8.038 | 0.484      | 6   |
| J              | 7.370 | 7.680 | 0.310      | 4   |
| K              | 7.293 | 7.576 | 0.283      | 4   |

**Table S6.** Calculated and experimental data for losartan anion (**1**) Rotamer **VII** (isomer *syn*); the following parameters were determined for their proton groups: experimental (Exp.) and calculated values of the chemical shifts (VII), absolute errors ( $\delta 7$ ) and values of the relative percentage errors (E); calculated NMR shielding for proton  $H^{\text{ref}} = 31.665$  ppm for TMS (PBE1PBE/6-31G(d,p)/GIAO/gas;  $R^2 = 0.72$ , MAD = 0.77.

| Proton Signals | Exp.  | Vacuum |            |    |
|----------------|-------|--------|------------|----|
|                |       | VII    | $\delta 7$ | E  |
| A              | 0.826 | 1.600  | 0.774      | 94 |
| B              | 1.270 | 1.273  | 0.003      | 0  |
| C              | 1.497 | 1.742  | 0.245      | 16 |
| D              | 2.515 | 2.447  | 0.068      | 3  |
| E              | 4.328 | 4.379  | 0.051      | 1  |
| OH             | 5.304 | 0.338  | 4.966      | 94 |
| F              | 5.228 | 5.078  | 0.149      | 3  |
| G              | 6.917 | 7.086  | 0.169      | 2  |
| H              | 7.108 | 7.677  | 0.569      | 8  |
| I              | 7.553 | 9.195  | 1.641      | 22 |
| J              | 7.370 | 7.080  | 0.290      | 4  |
| K              | 7.293 | 7.037  | 0.257      | 4  |

**Table S6b.** Calculated and experimental data for losartan anion (**1**) Rotamer **VIIb** (isomer *syn*); the following parameters were determined for their proton groups: experimental (Exp.) and calculated values of the chemical shifts (VIIb), absolute errors ( $\delta 7b$ ) and values of the relative percentage errors (E); calculated NMR shielding for proton  $H^{\text{ref}} = 31.6536$  ppm for TMS (PBE1PBE/6-31G(d,p)/GIAO/CPCM/DMSO;  $R^2 = 0.74$ , MAD = 0.66.

| Proton Signals | Exp.  | DMSO  |             |    |
|----------------|-------|-------|-------------|----|
|                |       | VIIb  | $\delta 7b$ | E  |
| A              | 0.826 | 1.000 | 0.174       | 21 |
| B              | 1.270 | 1.364 | 0.094       | 7  |
| C              | 1.497 | 1.289 | 0.208       | 14 |
| D              | 2.515 | 2.598 | 0.083       | 3  |
| E              | 4.328 | 4.445 | 0.116       | 3  |
| OH             | 5.304 | 0.122 | 5.182       | 98 |
| F              | 5.228 | 5.282 | 0.054       | 1  |
| G              | 6.917 | 7.260 | 0.343       | 5  |
| H              | 7.108 | 7.458 | 0.349       | 5  |
| I              | 7.553 | 8.209 | 0.656       | 9  |
| J              | 7.370 | 7.710 | 0.340       | 5  |
| K              | 7.293 | 7.608 | 0.315       | 4  |

**Table S7.** Calculated and experimental data for *syn*-losartan anion–water (1–water) Cluster IX; the following parameters were determined for their proton groups: experimental (Exp.) and calculated values of the chemical shifts (VII), absolute errors ( $\delta_9$ ) and values of the relative percentage errors (E); calculated NMR shielding for proton  $H^{\text{ref}} = 31.755$  ppm for TMS (B3LYP/6-31G(d,p)/GIAO/gas;  $R^2 = 0.95$ , MAD = 0.39).

| Proton Signals | Exp.  | Vacuum |            |    |
|----------------|-------|--------|------------|----|
|                |       | IX     | $\delta_9$ | E  |
| A              | 0.826 | 1.184  | 0.358      | 43 |
| B              | 1.270 | 1.264  | 0.006      | 0  |
| C              | 1.497 | 1.594  | 0.098      | 7  |
| D              | 2.515 | 2.440  | 0.076      | 3  |
| E              | 4.328 | 4.437  | 0.109      | 3  |
| OH             | 5.304 | 3.883  | 1.421      | 27 |
| F              | 5.228 | 4.740  | 0.487      | 9  |
| G              | 6.917 | 6.990  | 0.074      | 1  |
| H              | 7.108 | 7.342  | 0.234      | 3  |
| I              | 7.553 | 8.818  | 1.265      | 17 |
| J              | 7.370 | 7.075  | 0.295      | 4  |
| K              | 7.293 | 6.994  | 0.299      | 4  |

**Table S8.** Calculated and experimental data for *syn*-losartan anion–water (1–water) Cluster X; the following parameters were determined for their proton groups: experimental (Exp.) and calculated values of the chemical shifts (XI), absolute errors ( $\delta_{11}$ ) and values of the relative percentage errors (E); calculated NMR shielding for proton  $H^{\text{ref}} = 31.665$  ppm for TMS (PBE1PBE/6-31G(d,p)/GIAO/gas;  $R^2 = 0.93$ , MAD = 0.48).

| Proton Signals | Exp.  | Vacuum |               |    |
|----------------|-------|--------|---------------|----|
|                |       | XI     | $\delta_{11}$ | E  |
| A              | 0.826 | 1.235  | 0.409         | 50 |
| B              | 1.270 | 1.111  | 0.159         | 13 |
| C              | 1.497 | 1.801  | 0.304         | 20 |
| D              | 2.515 | 2.251  | 0.264         | 11 |
| E              | 4.328 | 4.294  | 0.034         | 1  |
| OH             | 5.304 | 3.725  | 1.579         | 30 |
| F              | 5.228 | 5.055  | 0.172         | 3  |
| G              | 6.917 | 7.169  | 0.253         | 4  |
| H              | 7.108 | 7.506  | 0.398         | 6  |
| I              | 7.553 | 9.162  | 1.609         | 21 |
| J              | 7.370 | 7.174  | 0.196         | 3  |
| K              | 7.293 | 6.921  | 0.373         | 5  |

**Table S9.** Calculated and experimental data for losartan anion (**1**) Rotamer **XI** (isomer *anti*); the following parameters were determined for their proton groups: experimental (Exp.) and calculated values of the chemical shifts (XI), absolute errors ( $\delta_{11}$ ) and values of the relative percentage errors (E); calculated NMR shielding for proton  $H^{\text{ref}} = 31.755$  ppm for TMS (B3LYP/6-31G(d,p)/GIAO/gas;  $R^2 = 0.96$ , MAD = 0.40.

| Proton Signals | Exp.  | Vacuum |               |    |
|----------------|-------|--------|---------------|----|
|                |       | XI     | $\delta_{11}$ | E  |
| A              | 0.826 | 0.990  | 0.164         | 20 |
| B              | 1.270 | 1.413  | 0.143         | 11 |
| C              | 1.497 | 1.810  | 0.314         | 21 |
| D              | 2.515 | 2.494  | 0.021         | 1  |
| E              | 4.328 | 4.388  | 0.060         | 1  |
| OH             | 5.304 | 6.756  | 1.452         | 27 |
| F              | 5.228 | 4.693  | 0.535         | 10 |
| G              | 6.917 | 7.237  | 0.320         | 5  |
| H              | 7.108 | 7.254  | 0.145         | 2  |
| I              | 7.553 | 8.557  | 1.004         | 13 |
| J              | 7.370 | 6.980  | 0.390         | 5  |
| K              | 7.293 | 7.048  | 0.246         | 3  |

**Table S9b.** Calculated and experimental data for losartan anion (**1**) Rotamer **XIb** (isomer *anti*); the following parameters were determined for their proton groups: experimental (Exp.) and calculated values of the chemical shifts (XIb), absolute errors ( $\delta_{11b}$ ) and values of the relative percentage errors (E); calculated NMR shielding for proton  $H^{\text{ref}} = 31.6536$  ppm for TMS (B3LYP/6-31G(d,p)/GIAO/CPCM/DMSO;  $R^2 = 0.99$ , MAD = 0.28.

| Proton Signals | Exp.  | DMSO  |                |    |
|----------------|-------|-------|----------------|----|
|                |       | XIb   | $\delta_{11b}$ | E  |
| A              | 0.826 | 1.039 | 0.212          | 26 |
| B              | 1.270 | 1.545 | 0.275          | 22 |
| C              | 1.497 | 1.802 | 0.305          | 20 |
| D              | 2.515 | 2.704 | 0.188          | 7  |
| E              | 4.328 | 4.307 | 0.022          | 1  |
| OH             | 5.304 | 5.972 | 0.668          | 13 |
| F              | 5.228 | 5.071 | 0.157          | 3  |
| G              | 6.917 | 7.668 | 0.752          | 11 |
| H              | 7.108 | 7.433 | 0.325          | 5  |
| I              | 7.553 | 8.378 | 0.825          | 11 |
| J              | 7.370 | 7.739 | 0.369          | 5  |
| K              | 7.293 | 7.680 | 0.387          | 5  |

**Table S10.** Calculated and experimental data for losartan anion (**1**) Rotamer **XIII** (isomer *anti*); the following parameters were determined for their proton groups: experimental (Exp.) and calculated values of the chemical shifts (XIII), absolute errors ( $\delta 13$ ) and values of the relative percentage errors (E); calculated NMR shielding for proton  $H^{\text{ref}} = 31.665$  ppm for TMS (PBE1PBE/6-31G(d,p)/GIAO/gas;  $R^2 = 0.95$ , MAD = 0.43.

| Proton Signals | Exp.  | Vacuum |             |    |
|----------------|-------|--------|-------------|----|
|                |       | XIII   | $\delta 13$ | E  |
| A              | 0.826 | 0.972  | 0.146       | 18 |
| B              | 1.270 | 1.392  | 0.121       | 10 |
| C              | 1.497 | 1.817  | 0.320       | 21 |
| D              | 2.515 | 2.532  | 0.016       | 1  |
| E              | 4.328 | 4.406  | 0.078       | 2  |
| OH             | 5.304 | 6.973  | 1.669       | 31 |
| F              | 5.228 | 4.745  | 0.483       | 9  |
| G              | 6.917 | 7.406  | 0.489       | 7  |
| H              | 7.108 | 7.428  | 0.320       | 4  |
| I              | 7.553 | 8.758  | 1.205       | 16 |
| J              | 7.370 | 7.131  | 0.239       | 3  |
| K              | 7.293 | 7.204  | 0.089       | 1  |

**Table S10b.** Calculated and experimental data for losartan anion (**1**) Rotamer **XIIIb** (isomer *anti*); the following parameters were determined for their proton groups: experimental (Exp.) and calculated values of the chemical shifts (XIIIb), absolute errors ( $\delta 13b$ ) and values of the relative percentage errors (E); calculated NMR shielding for proton  $H^{\text{ref}} = 31.6536$  ppm for TMS (PBE1PBE/6-31G(d,p)/GIAO/CPCM/DMSO;  $R^2 = 0.99$ , MAD = 0.37.

| Proton Signals | Exp.  | DMSO  |             |    |
|----------------|-------|-------|-------------|----|
|                |       | XIII  | $\delta 13$ | E  |
| A              | 0.826 | 1.039 | 0.212       | 26 |
| B              | 1.270 | 1.545 | 0.275       | 22 |
| C              | 1.497 | 1.802 | 0.305       | 20 |
| D              | 2.515 | 2.704 | 0.188       | 7  |
| E              | 4.328 | 4.307 | 0.022       | 1  |
| OH             | 5.304 | 5.972 | 0.668       | 13 |
| F              | 5.228 | 5.071 | 0.157       | 3  |
| G              | 6.917 | 7.668 | 0.752       | 11 |
| H              | 7.108 | 7.433 | 0.325       | 5  |
| I              | 7.553 | 8.378 | 0.825       | 11 |
| J              | 7.370 | 7.739 | 0.369       | 5  |
| K              | 7.293 | 7.680 | 0.387       | 5  |

**Table S11.** Calculated and experimental data for *anti*-losartan anion–water (1–water) Cluster **XV**; the following parameters were determined for their proton groups: experimental (Exp.) and calculated values of the chemical shifts (XV), absolute errors ( $\delta 15$ ) and values of the relative percentage errors (E); calculated NMR shielding for proton  $H^{\text{ref}} = 31.755$  ppm for TMS (B3LYP/6-31G(d,p)/GIAO/gas;  $R^2 = 0.95$ , MAD = 0.47.

| Proton Signals | Exp.  | Vacuum |             |    |
|----------------|-------|--------|-------------|----|
|                |       | XV     | $\delta 15$ | E  |
| A              | 0.826 | 1.092  | 0.266       | 32 |
| B              | 1.270 | 1.321  | 0.051       | 4  |
| C              | 1.497 | 1.367  | 0.130       | 9  |
| D              | 2.515 | 3.271  | 0.756       | 30 |
| E              | 4.328 | 4.452  | 0.123       | 3  |
| OH             | 5.304 | 6.640  | 1.336       | 25 |
| F              | 5.228 | 5.645  | 0.417       | 8  |
| G              | 6.917 | 7.151  | 0.235       | 3  |
| H              | 7.108 | 7.268  | 0.159       | 2  |
| I              | 7.553 | 8.989  | 1.435       | 19 |
| J              | 7.370 | 7.009  | 0.361       | 5  |
| K              | 7.293 | 6.946  | 0.348       | 5  |

**Table S12.** Calculated and experimental data for *anti*-losartan anion–water (1–water) **XVI**; the following parameters were determined for their proton groups: experimental (Exp.) and calculated values of the chemical shifts (XVI), absolute errors ( $\delta 16$ ) and values of the relative percentage errors (E); calculated NMR shielding for proton  $H^{\text{ref}} = 31.665$  ppm for TMS (PBE1PBE/6-31G(d,p)/GIAO/gas;  $R^2 = 0.95$ , MAD = 0.62.

| Proton Signals | Exp.  | Vacuum |             |    |
|----------------|-------|--------|-------------|----|
|                |       | XVI    | $\delta 16$ | E  |
| A              | 0.826 | 0.572  | 0.255       | 31 |
| B              | 1.270 | 1.456  | 0.186       | 15 |
| C              | 1.497 | 0.988  | 0.508       | 34 |
| D              | 2.515 | 2.340  | 0.175       | 7  |
| E              | 4.328 | 4.509  | 0.181       | 4  |
| OH             | 5.304 | 7.381  | 2.077       | 39 |
| F              | 5.228 | 5.035  | 0.193       | 4  |
| G              | 6.917 | 7.945  | 1.029       | 15 |
| H              | 7.108 | 7.554  | 0.446       | 6  |
| I              | 7.553 | 9.309  | 1.756       | 23 |
| J              | 7.370 | 7.262  | 0.108       | 1  |
| K              | 7.293 | 7.771  | 0.478       | 7  |



**Table S13.** Calculated and experimental data for *anti*-losartan anion (**1**) Rotamer **XVII** (isomer *syn*); the following parameters were determined for their proton groups: experimental (Exp.) and calculated values of the chemical shifts (XVII), absolute errors ( $\delta 17$ ) and values of the relative percentage errors (E); calculated NMR shielding for proton  $H^{\text{ref}} = 31.967$  ppm for TMS (MP2/6-31G(d,p)/GIAO/gas;  $R^2 = 0.72$ , MAD = 0.67.

| Proton Signals | Exp.  | Vacuum |             |    |
|----------------|-------|--------|-------------|----|
|                |       | XVII   | $\delta 19$ | E  |
| A              | 0.826 | 1.603  | 0.777       | 94 |
| B              | 1.270 | 1.192  | 0.078       | 6  |
| C              | 1.497 | 1.583  | 0.087       | 6  |
| D              | 2.515 | 2.440  | 0.075       | 3  |
| E              | 4.328 | 4.283  | 0.045       | 1  |
| OH             | 5.304 | 0.166  | 5.138       | 97 |
| F              | 5.228 | 5.092  | 0.136       | 3  |
| G              | 6.917 | 7.102  | 0.186       | 3  |
| H              | 7.108 | 7.514  | 0.406       | 6  |
| I              | 7.553 | 8.554  | 1.000       | 13 |
| J              | 7.370 | 7.238  | 0.132       | 2  |
| K              | 7.293 | 7.305  | 0.011       | 0  |

**Table S14.** Calculated and experimental data for losartan anion (**1**) Rotamer **XVIII** (isomer *syn*); the following parameters were determined for their proton groups: experimental (Exp.) and calculated values of the chemical shifts (XVIII), absolute errors ( $\delta 18$ ) and values of the relative percentage errors (E); calculated NMR shielding for proton  $H^{\text{ref}} = 31.957$  ppm for TMS (MP2/6-31G(d,p)/GIAO/CPCM;  $R^2 = 0.75$ , MAD = 0.65.

| Proton Signals | Exp.  | Vacuum |             |    |
|----------------|-------|--------|-------------|----|
|                |       | XVIII  | $\delta 18$ | E  |
| A              | 0.826 | 1.056  | 0.230       | 28 |
| B              | 1.270 | 1.334  | 0.064       | 5  |
| C              | 1.497 | 1.288  | 0.209       | 14 |
| D              | 2.515 | 2.610  | 0.095       | 4  |
| E              | 4.328 | 4.382  | 0.054       | 1  |
| OH             | 5.304 | 0.248  | 5.056       | 95 |
| F              | 5.228 | 5.271  | 0.043       | 1  |
| G              | 6.917 | 7.261  | 0.345       | 5  |
| H              | 7.108 | 7.435  | 0.327       | 5  |
| I              | 7.553 | 7.935  | 0.382       | 5  |
| J              | 7.370 | 7.850  | 0.480       | 7  |
| K              | 7.293 | 7.845  | 0.552       | 8  |

**Table S15.** Calculated and experimental data for losartan anion (**1**) Rotamer **XIX** (isomer *anti*); the following parameters were determined for their proton groups: experimental (Exp.) and calculated values of the chemical shifts (XIX), absolute errors ( $\delta_{19}$ ) and values of the relative percentage errors (E); calculated NMR shielding for proton  $H^{\text{ref}} = 31.967$  ppm for TMS (MP2/6-31G(d,p)/GIAO/gas;  $R^2 = 0.97$ , MAD = 0.34.

| Proton Signals | Exp.  | Vacuum |               |    |
|----------------|-------|--------|---------------|----|
|                |       | XIX    | $\delta_{19}$ | E  |
| A              | 0.826 | 0.972  | 0.146         | 18 |
| B              | 1.270 | 1.327  | 0.057         | 5  |
| C              | 1.497 | 1.804  | 0.307         | 21 |
| D              | 2.515 | 2.523  | 0.008         | 0  |
| E              | 4.328 | 4.327  | 0.001         | 0  |
| OH             | 5.304 | 6.878  | 1.574         | 30 |
| F              | 5.228 | 4.866  | 0.362         | 7  |
| G              | 6.917 | 7.343  | 0.427         | 6  |
| H              | 7.108 | 7.354  | 0.246         | 3  |
| I              | 7.553 | 8.302  | 0.749         | 10 |
| J              | 7.370 | 7.293  | 0.077         | 1  |
| K              | 7.293 | 7.451  | 0.158         | 2  |

**Table S16.** Calculated and experimental data for losartan anion (**1**) Rotamer **XX** (isomer *anti*); the following parameters were determined for their proton groups: experimental (Exp.) and calculated values of the chemical shifts (XX), absolute errors ( $\delta_{20}$ ) and values of the relative percentage errors (E); calculated NMR shielding for proton  $H^{\text{ref}} = 31.957$  ppm for TMS (MP2/6-31G(d,p)/GIAO/CPCM;  $R^2 = 0.99$ , MAD = 0.36.

| Proton Signals | Exp.  | Vacuum |               |    |
|----------------|-------|--------|---------------|----|
|                |       | XX     | $\delta_{20}$ | E  |
| A              | 0.826 | 0.972  | 0.146         | 18 |
| B              | 1.270 | 1.327  | 0.057         | 5  |
| C              | 1.497 | 1.804  | 0.307         | 21 |
| D              | 2.515 | 2.523  | 0.008         | 0  |
| E              | 4.328 | 4.327  | 0.001         | 0  |
| OH             | 5.304 | 6.878  | 1.574         | 30 |
| F              | 5.228 | 4.866  | 0.362         | 7  |
| G              | 6.917 | 7.343  | 0.427         | 6  |
| H              | 7.108 | 7.354  | 0.246         | 3  |
| I              | 7.553 | 8.302  | 0.749         | 10 |
| J              | 7.370 | 7.293  | 0.077         | 1  |
| K              | 7.293 | 7.451  | 0.158         | 2  |

**Table S17.** Calculated energy of losartan anion (**1**) rotamers; the following approaches were considered: (a) B3LYP/6-31G(d,p); (b) PBE1PBE/6-31G(d,p); (c) MP2/6-31G(d,p).

| Methods |       | Energy (kcal/mol) |             |               |               |
|---------|-------|-------------------|-------------|---------------|---------------|
| DFT     | a     | vacuum            | <b>I</b>    | <i>syn</i>    | -1,076,542.05 |
|         |       |                   | <b>XI</b>   | <i>anti</i>   | -1,076,546.45 |
|         |       | water             | <b>II</b>   | <i>syn</i>    | -1,076,597.98 |
|         |       |                   | <b>XII</b>  | <i>anti</i>   | -1,076,600.96 |
|         | b     | vacuum            | <b>VII</b>  | <i>syn</i>    | -1,075,543.42 |
|         |       |                   | <b>XIII</b> | <i>anti</i>   | -1,075,548.96 |
|         |       | water             | <b>VIII</b> | <i>syn</i>    | -1,075,601.04 |
|         |       |                   | <b>XIV</b>  | <i>anti</i>   | -1,075,604.20 |
| MP2     | c     | vacuum            | <b>XVII</b> | <i>syn</i>    | -1,071,129.32 |
|         |       |                   | <b>XIX</b>  | <i>anti</i>   | -1,071,132.90 |
|         | water | <b>XVIII</b>      | <i>syn</i>  | -1,071,191.71 |               |
|         |       | <b>XX</b>         | <i>anti</i> | -1,071,192.79 |               |

**Table S18.** Estimated changes in torsion angles for optimized rotamers; the following approaches were considered: (a) B3LYP/6-31G(d,p); (b) PBE1PBE/6-31G(d,p); (c) MP2/6-31G(d,p).

| Type of<br>Torsion<br>Angle | Torsion Angles (°) |             |            |             |            |             |             |             |             |             |              |             |
|-----------------------------|--------------------|-------------|------------|-------------|------------|-------------|-------------|-------------|-------------|-------------|--------------|-------------|
|                             | a                  |             |            |             | b          |             |             |             | c           |             |              |             |
|                             | Vacuum             |             | Water      |             | Vacuum     |             | Water       |             | Vacuum      |             | Water        |             |
|                             | <b>I</b>           | <b>XI</b>   | <b>II</b>  | <b>XII</b>  | <b>VII</b> | <b>XIII</b> | <b>VIII</b> | <b>XIV</b>  | <b>XVII</b> | <b>XIX</b>  | <b>XVIII</b> | <b>XX</b>   |
|                             | <i>syn</i>         | <i>anti</i> | <i>syn</i> | <i>anti</i> | <i>syn</i> | <i>anti</i> | <i>syn</i>  | <i>anti</i> | <i>syn</i>  | <i>anti</i> | <i>syn</i>   | <i>anti</i> |
| C16–C17–N6                  | 126.3              | 127.6       | 125.3      | 127.3       | 126.3      | 127.8       | 125.3       | 127.4       | 124.6       | 125.9       | 124.0        | 125.8       |
| C8–C11–C12                  | 117.7              | 118.7       | 118.1      | 118.7       | 117.6      | 118.8       | 118.4       | 118.9       | 119.9       | 120.4       | 119.8        | 120.1       |
| C4–C5–C10                   | 118.9              | 119.6       | 118.9      | 119.8       | 118.9      | 119.6       | 119.2       | 119.9       | 119.6       | 119.5       | 119.7        | 119.9       |
| C4–N2–C3                    | 125.3              | 127.0       | 125.2      | 126.6       | 125.3      | 126.6       | 125.0       | 126.2       | 124.9       | 125.9       | 124.7        | 125.7       |
| C22–C3–N2                   | 124.5              | 126.5       | 125.0      | 127.1       | 124.5      | 126.4       | 124.9       | 127.0       | 124.4       | 126.0       | 124.8        | 126.7       |
| C18–C2–N1                   | 123.6              | 122.8       | 123.7      | 123.2       | 123.7      | 123.1       | 123.9       | 123.5       | 124.4       | 123.7       | 124.4        | 124.0       |

### Equation S1: Boltzmann Distribution Equation

$$N_i/N_{\text{tot}} = e^{-\Delta E/RT} \sum_{k=1}^{N_{\text{tot}}} e^{-\Delta E_k/RT}$$

where  $\Delta E$ , the relative energy of the  $i$ -th conformer from the minimum energy conformer;  $\Delta E_k$ , the relative energy of the  $k$ -th conformer from the minimum energy conformer;  $R$ , the molar ideal gas constant equal to 8.31 J/(mol·K);  $T$ , temperature in Kelvin.

Distribution (%):

*syn*-isomers:

**I:** 8.6 **II:** 8.9 **VII:** 9.0 **VIII:** 9.1 **XVII:** 9.7 **XVIII:** 10.0

*anti*-isomers:

**XI:** 15.3 **XII:** 16.0 **XIII:** 17.2 **XIV:** 17.4 **XIX:** 16.9 **XX:** 17.1

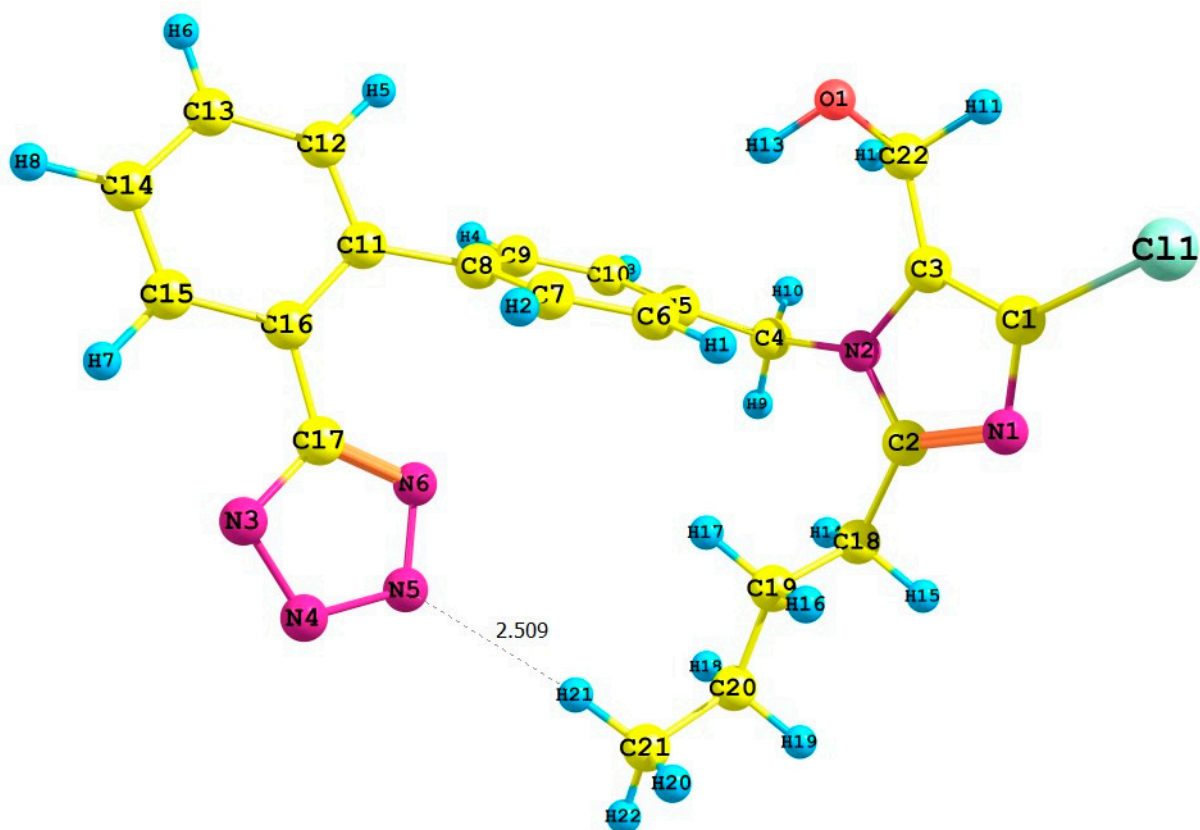

**Figure S1.** Optimized structure of the *syn*-losartan anion **1** (B3LYP/6-31G(d,p)/gas level of theory, Rotamer I).

Cartesian coordinates:

|   |              |              |              |
|---|--------------|--------------|--------------|
| C | -4.562535000 | -1.467681000 | 0.793771000  |
| N | -4.739533000 | -0.123499000 | 0.741346000  |
| C | -3.931366000 | 0.291879000  | -0.225854000 |
| N | -3.253734000 | -0.762041000 | -0.792314000 |
| C | -3.655861000 | -1.924876000 | -0.133509000 |
| C | -2.313018000 | -0.707371000 | -1.906249000 |
| C | -0.847646000 | -0.852037000 | -1.531558000 |
| C | -0.379484000 | -0.611677000 | -0.232213000 |
| C | 0.986809000  | -0.578046000 | 0.030725000  |
| C | 1.926942000  | -0.783385000 | -0.987729000 |
| C | 1.449833000  | -1.091051000 | -2.268913000 |
| C | 0.082859000  | -1.123321000 | -2.539278000 |
| C | 3.390484000  | -0.713601000 | -0.714465000 |
| C | 4.157463000  | -1.861356000 | -0.973033000 |
| C | 5.523241000  | -1.909140000 | -0.706148000 |
| C | 6.144557000  | -0.780780000 | -0.165150000 |
| C | 5.406475000  | 0.370838000  | 0.078871000  |
| C | 4.024538000  | 0.446404000  | -0.194424000 |

|    |              |              |              |
|----|--------------|--------------|--------------|
| C  | 3.353563000  | 1.730745000  | 0.048798000  |
| N  | 3.934006000  | 2.722791000  | 0.759307000  |
| N  | 3.050482000  | 3.722623000  | 0.733244000  |
| N  | 1.981743000  | 3.351434000  | 0.026064000  |
| N  | 2.144420000  | 2.100788000  | -0.418337000 |
| C  | -3.767371000 | 1.732726000  | -0.610404000 |
| C  | -2.567292000 | 2.446085000  | 0.052398000  |
| C  | -2.478781000 | 3.929077000  | -0.329187000 |
| C  | -1.346328000 | 4.667108000  | 0.393339000  |
| C  | -3.116750000 | -3.289183000 | -0.419326000 |
| O  | -1.889811000 | -3.601340000 | 0.233402000  |
| Cl | -5.451734000 | -2.452570000 | 1.926887000  |
| H  | -1.082502000 | -0.409961000 | 0.569875000  |
| H  | 1.333165000  | -0.348689000 | 1.032107000  |
| H  | -0.260533000 | -1.327480000 | -3.551862000 |
| H  | 2.161956000  | -1.267669000 | -3.069854000 |
| H  | 3.653524000  | -2.740167000 | -1.368448000 |
| H  | 6.089418000  | -2.814758000 | -0.907904000 |
| H  | 5.876741000  | 1.260921000  | 0.482488000  |
| H  | 7.208865000  | -0.795790000 | 0.058319000  |
| H  | -2.464430000 | 0.256301000  | -2.400940000 |
| H  | -2.596296000 | -1.474158000 | -2.636655000 |
| H  | -3.842218000 | -4.019922000 | -0.052728000 |
| H  | -3.032142000 | -3.438350000 | -1.508548000 |
| H  | -1.237765000 | -2.931240000 | -0.023303000 |
| H  | -3.697200000 | 1.835787000  | -1.701443000 |
| H  | -4.693635000 | 2.232651000  | -0.309954000 |
| H  | -2.667536000 | 2.349654000  | 1.140995000  |
| H  | -1.627860000 | 1.950705000  | -0.217934000 |
| H  | -2.335241000 | 4.010073000  | -1.416252000 |
| H  | -3.442920000 | 4.414159000  | -0.112951000 |
| H  | -1.494779000 | 4.634199000  | 1.479674000  |
| H  | -0.361615000 | 4.234262000  | 0.178148000  |
| H  | -1.320782000 | 5.722580000  | 0.098557000  |

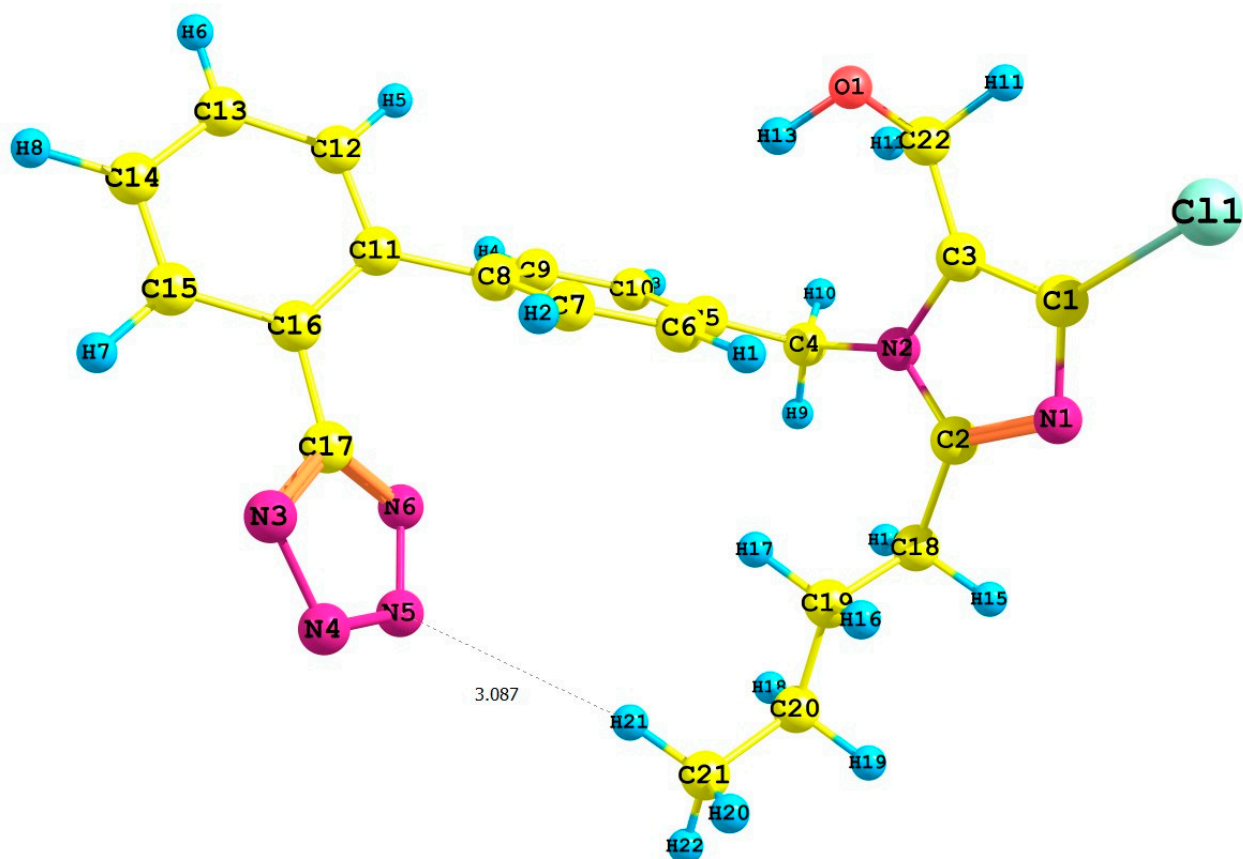

**Figure S2.** Optimized structure of the *syn*-losartan anion **1** (B3LYP/6-31G(d,p)/CPCM level of theory, Rotamer II).

Cartesian coordinates:

|   |              |              |              |
|---|--------------|--------------|--------------|
| C | -4.426344000 | -1.502317000 | 0.893953000  |
| N | -4.695206000 | -0.172463000 | 0.826701000  |
| C | -3.952268000 | 0.276167000  | -0.180226000 |
| N | -3.223938000 | -0.739789000 | -0.747848000 |
| C | -3.526523000 | -1.915109000 | -0.059046000 |
| C | -2.321237000 | -0.643736000 | -1.893172000 |
| C | -0.841708000 | -0.723909000 | -1.550583000 |
| C | -0.350705000 | -0.476596000 | -0.261309000 |
| C | 1.021465000  | -0.476501000 | -0.011343000 |
| C | 1.945070000  | -0.715768000 | -1.038652000 |
| C | 1.445303000  | -0.992673000 | -2.320941000 |
| C | 0.074838000  | -0.997570000 | -2.573213000 |
| C | 3.410870000  | -0.742864000 | -0.766816000 |
| C | 4.125941000  | -1.901595000 | -1.113197000 |
| C | 5.482030000  | -2.039918000 | -0.822896000 |
| C | 6.151920000  | -1.005621000 | -0.167404000 |
| C | 5.464250000  | 0.159293000  | 0.163505000  |
| C | 4.099918000  | 0.322918000  | -0.135384000 |

|    |              |              |              |
|----|--------------|--------------|--------------|
| C  | 3.473986000  | 1.619824000  | 0.194233000  |
| N  | 3.782116000  | 2.324944000  | 1.300813000  |
| N  | 3.055804000  | 3.450460000  | 1.199939000  |
| N  | 2.351883000  | 3.423739000  | 0.076047000  |
| N  | 2.593953000  | 2.278083000  | -0.582867000 |
| C  | -3.905053000 | 1.714560000  | -0.601738000 |
| C  | -2.722627000 | 2.506262000  | -0.003238000 |
| C  | -2.713964000 | 3.977688000  | -0.432436000 |
| C  | -1.568796000 | 4.774864000  | 0.200554000  |
| C  | -2.919779000 | -3.252934000 | -0.336318000 |
| O  | -1.694104000 | -3.497844000 | 0.361867000  |
| Cl | -5.199827000 | -2.516326000 | 2.086303000  |
| H  | -1.039318000 | -0.278293000 | 0.553910000  |
| H  | 1.379327000  | -0.281799000 | 0.994466000  |
| H  | -0.283916000 | -1.203805000 | -3.578387000 |
| H  | 2.138650000  | -1.191807000 | -3.132700000 |
| H  | 3.593698000  | -2.718520000 | -1.591990000 |
| H  | 6.005470000  | -2.951333000 | -1.095861000 |
| H  | 5.983322000  | 0.979157000  | 0.649065000  |
| H  | 7.206745000  | -1.099373000 | 0.073754000  |
| H  | -2.531904000 | 0.304772000  | -2.393013000 |
| H  | -2.583539000 | -1.428226000 | -2.609110000 |
| H  | -3.615724000 | -4.019940000 | 0.011092000  |
| H  | -2.792493000 | -3.398631000 | -1.417401000 |
| H  | -1.035928000 | -2.871090000 | 0.026239000  |
| H  | -3.887611000 | 1.795080000  | -1.695056000 |
| H  | -4.845919000 | 2.165574000  | -0.272226000 |
| H  | -2.773491000 | 2.439307000  | 1.091164000  |
| H  | -1.775345000 | 2.038598000  | -0.298002000 |
| H  | -2.641871000 | 4.033308000  | -1.526976000 |
| H  | -3.674250000 | 4.439145000  | -0.165632000 |
| H  | -1.654590000 | 4.784532000  | 1.293246000  |
| H  | -0.591769000 | 4.345646000  | -0.049053000 |
| H  | -1.574428000 | 5.815081000  | -0.141368000 |

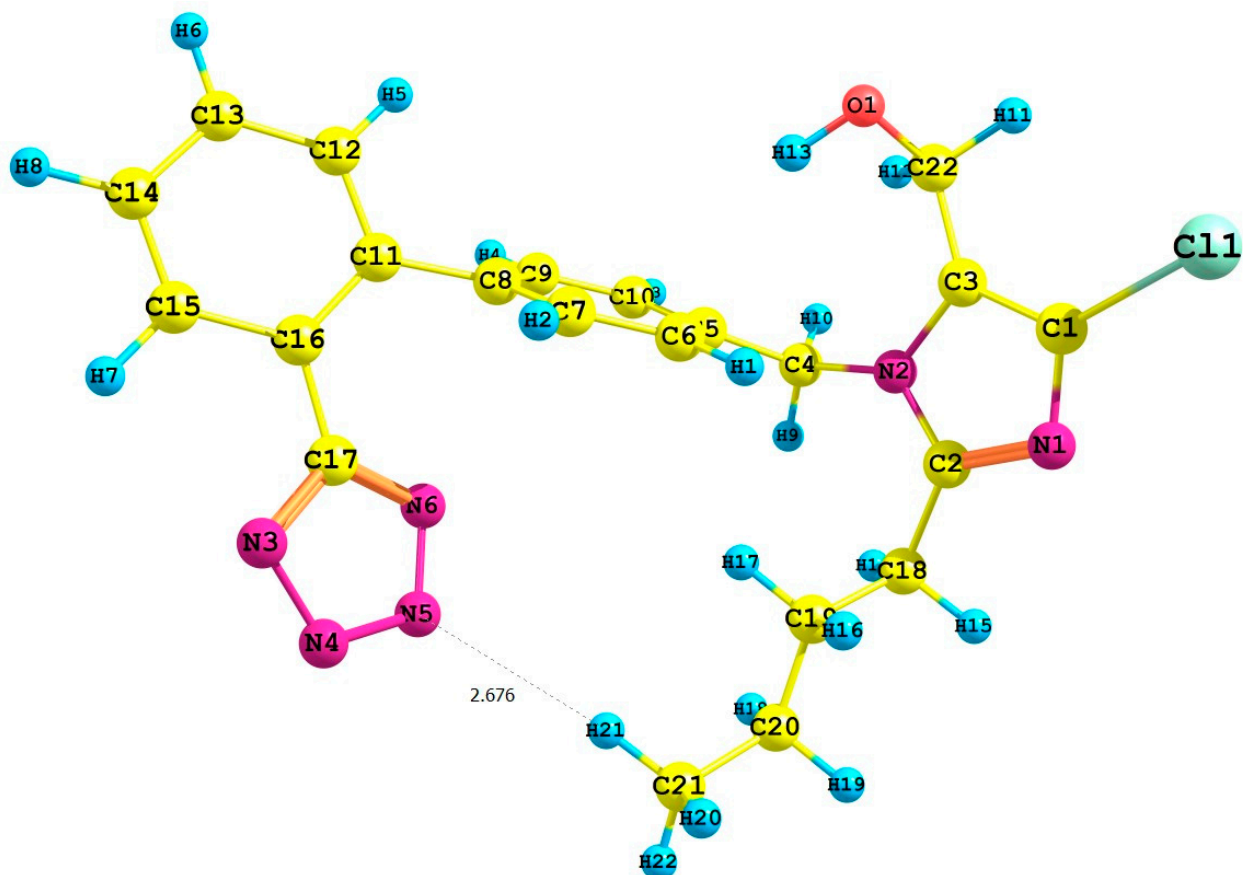

**Figure S3.** Optimized structure of the *syn*-losartan anion **1** (B3LYP/6-311+G(d,p)/gas level of theory, Rotamer **III**).

Cartesian coordinates:

|   |              |              |              |
|---|--------------|--------------|--------------|
| C | -4.574034000 | -1.420936000 | 0.733870000  |
| N | -4.754792000 | -0.078697000 | 0.705653000  |
| C | -3.931937000 | 0.365518000  | -0.233763000 |
| N | -3.236826000 | -0.669550000 | -0.807779000 |
| C | -3.645837000 | -1.849580000 | -0.182440000 |
| C | -2.274436000 | -0.581858000 | -1.902554000 |
| C | -0.820610000 | -0.781659000 | -1.511959000 |
| C | -0.356905000 | -0.556734000 | -0.212494000 |
| C | 1.004915000  | -0.592223000 | 0.066989000  |
| C | 1.942817000  | -0.849572000 | -0.937870000 |
| C | 1.468800000  | -1.134106000 | -2.222390000 |
| C | 0.106882000  | -1.098562000 | -2.506694000 |
| C | 3.403398000  | -0.836346000 | -0.643461000 |
| C | 4.128422000  | -2.022075000 | -0.826916000 |
| C | 5.482799000  | -2.105416000 | -0.518481000 |
| C | 6.132848000  | -0.979414000 | -0.012042000 |
| C | 5.434171000  | 0.208703000  | 0.156868000  |
| C | 4.067841000  | 0.318408000  | -0.162831000 |



|    |              |              |              |
|----|--------------|--------------|--------------|
| C  | 3.424069000  | 1.629359000  | -0.003615000 |
| N  | 3.899444000  | 2.579194000  | 0.824585000  |
| N  | 3.074600000  | 3.615900000  | 0.661662000  |
| N  | 2.147381000  | 3.308613000  | -0.237131000 |
| N  | 2.340783000  | 2.059799000  | -0.674070000 |
| C  | -3.780888000 | 1.811787000  | -0.595361000 |
| C  | -2.558431000 | 2.511656000  | 0.035790000  |
| C  | -2.475889000 | 3.999243000  | -0.324819000 |
| C  | -1.293243000 | 4.709883000  | 0.341667000  |
| C  | -3.117882000 | -3.207639000 | -0.501183000 |
| O  | -1.925523000 | -3.576662000 | 0.198007000  |
| Cl | -5.479243000 | -2.429789000 | 1.828507000  |
| H  | -1.055225000 | -0.318481000 | 0.581668000  |
| H  | 1.349691000  | -0.376001000 | 1.070843000  |
| H  | -0.232640000 | -1.287799000 | -3.521524000 |
| H  | 2.178039000  | -1.340608000 | -3.016227000 |
| H  | 3.604556000  | -2.899885000 | -1.191924000 |
| H  | 6.018256000  | -3.038314000 | -0.660347000 |
| H  | 5.930391000  | 1.094657000  | 0.533308000  |
| H  | 7.186998000  | -1.025299000 | 0.242818000  |
| H  | -2.394321000 | 0.407433000  | -2.348855000 |
| H  | -2.558652000 | -1.305607000 | -2.672603000 |
| H  | -3.865517000 | -3.943605000 | -0.203634000 |
| H  | -2.967064000 | -3.311511000 | -1.584465000 |
| H  | -1.241680000 | -2.919764000 | 0.011633000  |
| H  | -3.746723000 | 1.931453000  | -1.684983000 |
| H  | -4.695540000 | 2.304574000  | -0.256480000 |
| H  | -2.617418000 | 2.399588000  | 1.124271000  |
| H  | -1.632712000 | 2.019101000  | -0.276502000 |
| H  | -2.393556000 | 4.098686000  | -1.415040000 |
| H  | -3.417168000 | 4.490535000  | -0.042446000 |
| H  | -1.372028000 | 4.656401000  | 1.432804000  |
| H  | -0.333655000 | 4.268018000  | 0.056289000  |
| H  | -1.267647000 | 5.768634000  | 0.065131000  |

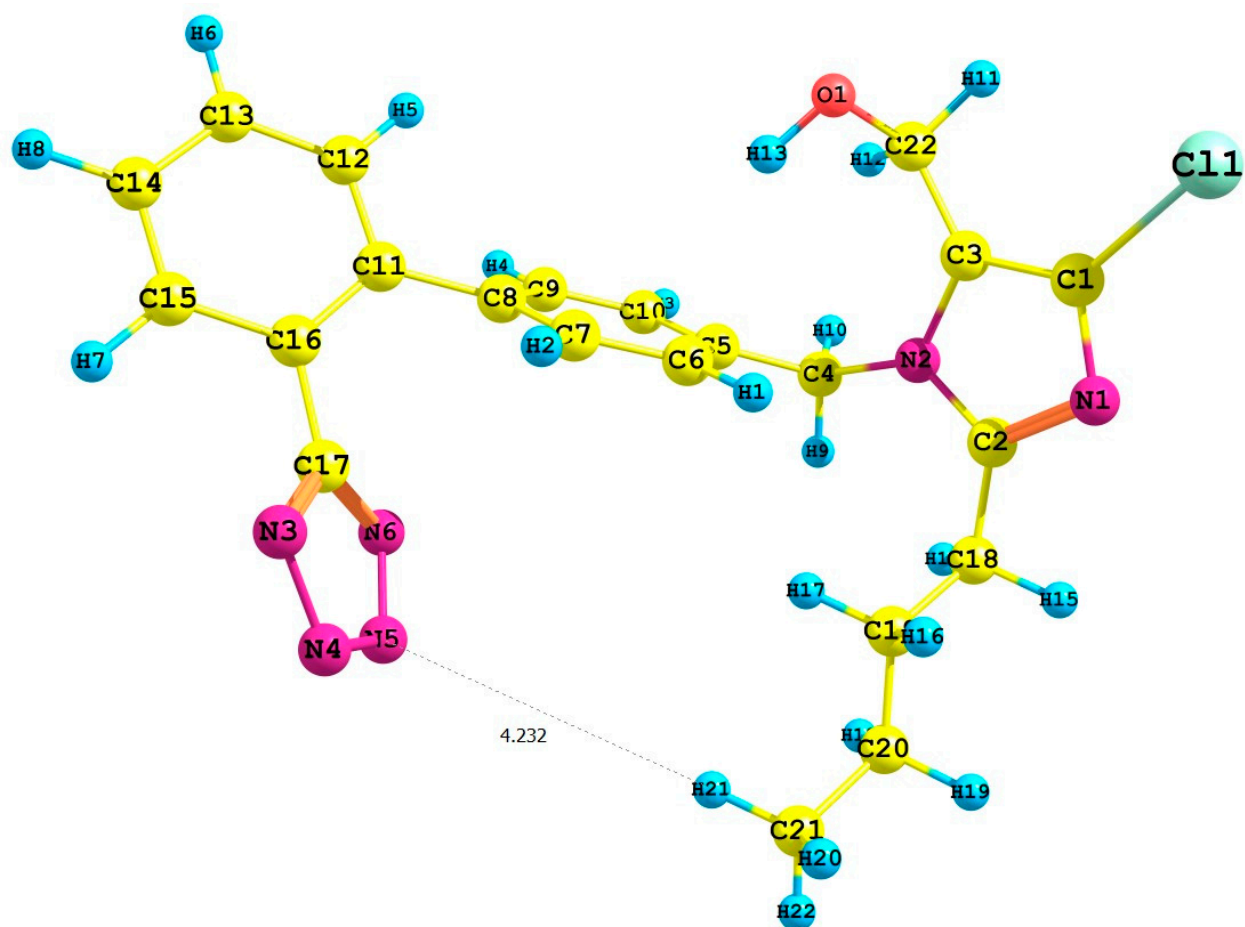

**Figure S4.** Optimized structure of the *syn*-losartan anion **1** (B3LYP/6-311+G(d,p)/CPCM level of theory, Rotamer **IV**).

Cartesian coordinates:

|   |              |              |              |
|---|--------------|--------------|--------------|
| C | -4.325943000 | -1.510529000 | 0.812589000  |
| N | -4.694331000 | -0.205720000 | 0.776126000  |
| C | -3.959544000 | 0.338001000  | -0.188194000 |
| N | -3.132875000 | -0.594009000 | -0.757195000 |
| C | -3.365851000 | -1.814159000 | -0.118529000 |
| C | -2.213276000 | -0.387302000 | -1.878919000 |
| C | -0.744869000 | -0.562642000 | -1.531614000 |
| C | -0.231819000 | -0.241685000 | -0.269815000 |
| C | 1.129953000  | -0.363204000 | -0.003556000 |
| C | 2.022741000  | -0.805219000 | -0.988625000 |
| C | 1.501835000  | -1.135078000 | -2.246513000 |
| C | 0.140126000  | -1.016087000 | -2.513579000 |
| C | 3.472179000  | -0.984237000 | -0.691638000 |
| C | 4.052126000  | -2.237757000 | -0.939831000 |
| C | 5.380459000  | -2.503817000 | -0.620260000 |
| C | 6.160258000  | -1.507197000 | -0.036009000 |

|    |              |              |              |
|----|--------------|--------------|--------------|
| C  | 5.606829000  | -0.252615000 | 0.200046000  |
| C  | 4.273457000  | 0.035110000  | -0.128909000 |
| C  | 3.786403000  | 1.411926000  | 0.096493000  |
| N  | 3.974279000  | 2.089503000  | 1.240971000  |
| N  | 3.436754000  | 3.299156000  | 1.015331000  |
| N  | 2.957796000  | 3.346161000  | -0.212484000 |
| N  | 3.162257000  | 2.167374000  | -0.821021000 |
| C  | -4.045198000 | 1.779600000  | -0.584956000 |
| C  | -2.931823000 | 2.674189000  | -0.003930000 |
| C  | -3.115217000 | 4.149506000  | -0.375572000 |
| C  | -2.020337000 | 5.051440000  | 0.200963000  |
| C  | -2.680384000 | -3.099309000 | -0.438605000 |
| O  | -1.488119000 | -3.343364000 | 0.330097000  |
| Cl | -5.057422000 | -2.618807000 | 1.941514000  |
| H  | -0.894831000 | 0.098914000  | 0.517301000  |
| H  | 1.499710000  | -0.118322000 | 0.985136000  |
| H  | -0.234735000 | -1.278944000 | -3.497365000 |
| H  | 2.167849000  | -1.482319000 | -3.028361000 |
| H  | 3.437454000  | -3.023991000 | -1.363577000 |
| H  | 5.797721000  | -3.485075000 | -0.815809000 |
| H  | 6.215860000  | 0.534462000  | 0.628731000  |
| H  | 7.194614000  | -1.700675000 | 0.224634000  |
| H  | -2.387599000 | 0.622143000  | -2.253250000 |
| H  | -2.487611000 | -1.068254000 | -2.687514000 |
| H  | -3.351955000 | -3.922171000 | -0.194569000 |
| H  | -2.458505000 | -3.162484000 | -1.508695000 |
| H  | -0.848645000 | -2.648417000 | 0.125960000  |
| H  | -4.059336000 | 1.871749000  | -1.675772000 |
| H  | -5.015050000 | 2.137330000  | -0.231359000 |
| H  | -2.922616000 | 2.567259000  | 1.086616000  |
| H  | -1.953541000 | 2.331376000  | -0.358397000 |
| H  | -3.132342000 | 4.246520000  | -1.467708000 |
| H  | -4.095376000 | 4.490252000  | -0.021394000 |
| H  | -2.000490000 | 4.998826000  | 1.294026000  |
| H  | -1.031891000 | 4.755768000  | -0.164175000 |
| H  | -2.180050000 | 6.096275000  | -0.079355000 |

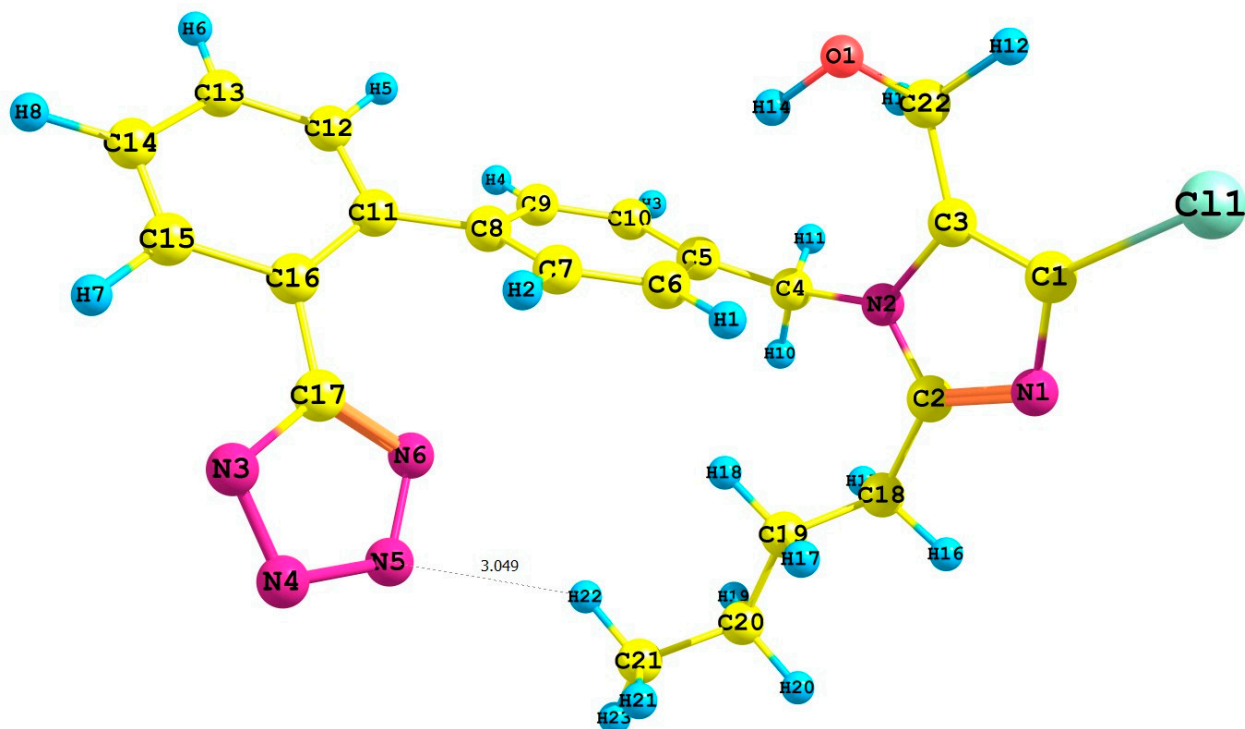

**Figure S5.** Optimized structure of the *syn*-losartan anion **1** (CAM-B3LYP/6-31G(d,p)/gas level of theory, Rotamer **V**).

Cartesian coordinates:

|   |              |              |              |
|---|--------------|--------------|--------------|
| C | 4.602047000  | -0.579952000 | -0.738177000 |
| N | 4.567873000  | 0.750814000  | -0.486537000 |
| C | 3.661237000  | 0.889011000  | 0.462214000  |
| N | 3.127322000  | -0.313789000 | 0.822598000  |
| C | 3.729354000  | -1.286593000 | 0.043103000  |
| C | 2.124707000  | -0.560359000 | 1.855618000  |
| C | 0.754001000  | -0.922364000 | 1.343758000  |
| C | 0.253259000  | -0.473941000 | 0.107353000  |
| C | -1.077173000 | -0.611100000 | -0.224066000 |
| C | -2.025171000 | -1.193514000 | 0.664787000  |
| C | -1.487246000 | -1.689947000 | 1.885641000  |
| C | -0.157672000 | -1.552668000 | 2.213165000  |
| C | -3.422209000 | -1.327158000 | 0.330714000  |
| C | -4.130743000 | -2.472604000 | 0.788389000  |
| C | -5.393409000 | -2.796702000 | 0.364591000  |
| C | -6.056626000 | -1.965091000 | -0.570162000 |
| C | -5.437621000 | -0.813266000 | -0.988950000 |
| C | -4.156521000 | -0.426237000 | -0.532831000 |
| C | -3.751099000 | 0.925513000  | -0.852982000 |
| N | -4.368224000 | 1.667572000  | -1.840006000 |
| N | -3.827413000 | 2.842442000  | -1.843157000 |

|    |              |              |              |
|----|--------------|--------------|--------------|
| N  | -2.916543000 | 2.821502000  | -0.887365000 |
| N  | -2.812086000 | 1.662295000  | -0.234198000 |
| C  | 3.250084000  | 2.208204000  | 1.037643000  |
| C  | 1.866949000  | 2.681210000  | 0.571311000  |
| C  | 1.442363000  | 4.010901000  | 1.187782000  |
| C  | 0.040462000  | 4.427648000  | 0.748894000  |
| C  | 3.389022000  | -2.738564000 | 0.112663000  |
| O  | 2.195426000  | -3.096989000 | -0.547746000 |
| Cl | 5.683568000  | -1.242402000 | -1.923023000 |
| H  | 0.932329000  | -0.027744000 | -0.614949000 |
| H  | -1.406753000 | -0.296390000 | -1.205914000 |
| H  | 0.190628000  | -1.914192000 | 3.179839000  |
| H  | -2.155014000 | -2.150246000 | 2.607009000  |
| H  | -3.609548000 | -3.164208000 | 1.443659000  |
| H  | -5.866746000 | -3.707926000 | 0.720936000  |
| H  | -5.951141000 | -0.136735000 | -1.664299000 |
| H  | -7.046369000 | -2.221420000 | -0.936067000 |
| H  | 2.094308000  | 0.350488000  | 2.465773000  |
| H  | 2.505217000  | -1.347738000 | 2.517016000  |
| H  | 4.193505000  | -3.290893000 | -0.378432000 |
| H  | 3.374018000  | -3.061253000 | 1.165939000  |
| H  | 1.468296000  | -2.599556000 | -0.139165000 |
| H  | 3.273053000  | 2.171418000  | 2.134079000  |
| H  | 4.015141000  | 2.925570000  | 0.729548000  |
| H  | 1.876103000  | 2.765888000  | -0.521792000 |
| H  | 1.112794000  | 1.924350000  | 0.807475000  |
| H  | 1.469135000  | 3.927537000  | 2.281821000  |
| H  | 2.165042000  | 4.793289000  | 0.922754000  |
| H  | 0.002085000  | 4.565147000  | -0.337732000 |
| H  | -0.688860000 | 3.656619000  | 1.019039000  |

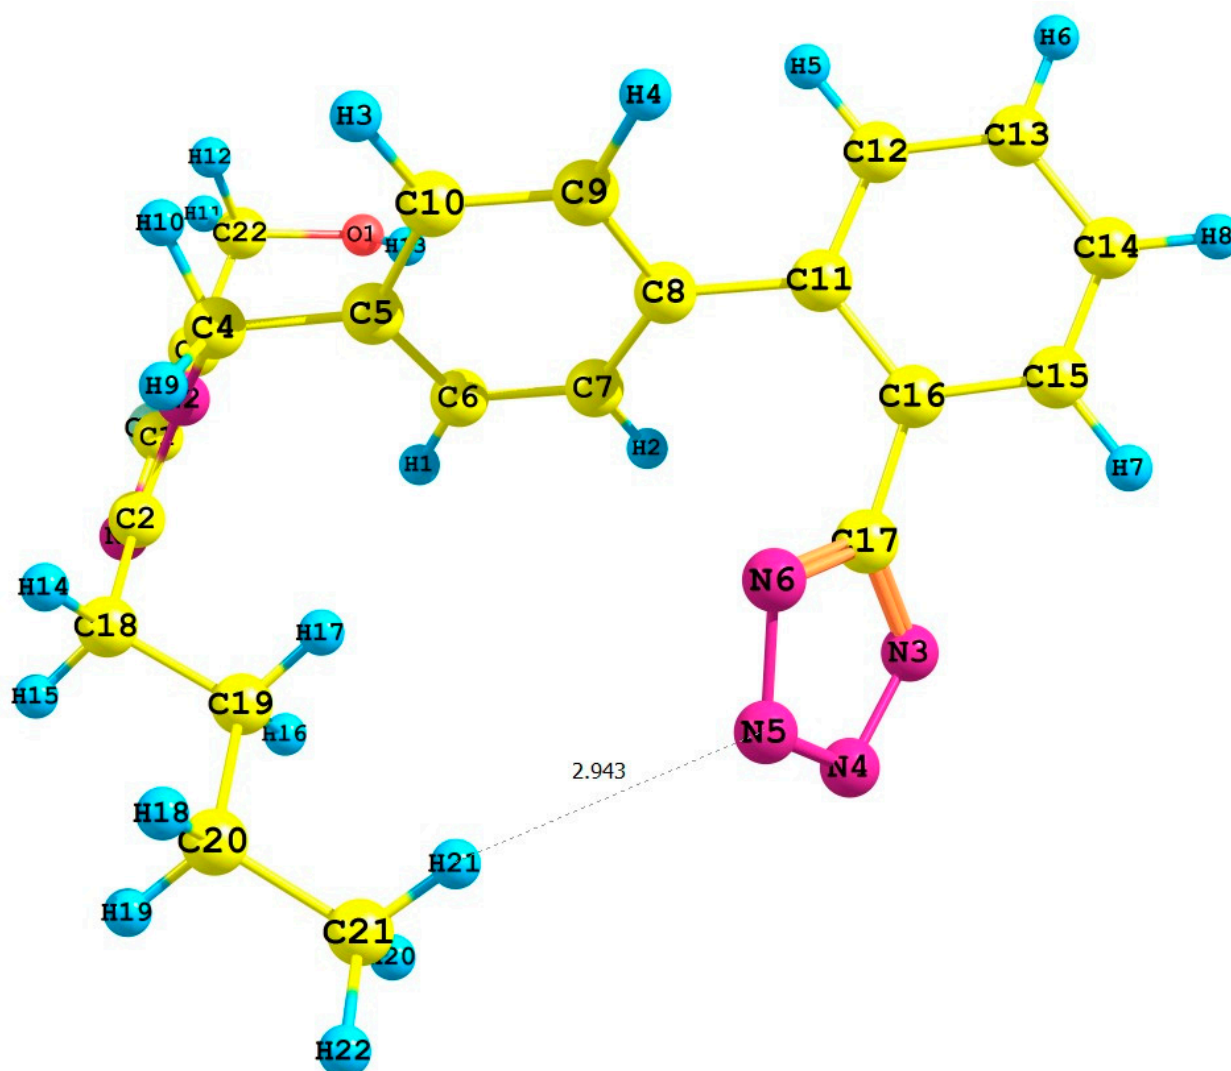

**Figure S6.** Optimized structure of the *syn*-losartan anion **1** (CAM-B3LYP/6-31G(d,p)/CPCM level of theory, Rotamer **VI**).

Cartesian coordinates:

|   |             |              |              |
|---|-------------|--------------|--------------|
| C | 1.008001000 | 2.105147000  | 0.308414000  |
| N | 1.231773000 | 2.134323000  | 1.644925000  |
| C | 2.064393000 | 1.134064000  | 1.872642000  |
| N | 2.372004000 | 0.476181000  | 0.716748000  |
| C | 1.691367000 | 1.102028000  | -0.318498000 |
| C | 3.272756000 | -0.655867000 | 0.565643000  |
| C | 2.582249000 | -1.979501000 | 0.305992000  |
| C | 1.239045000 | -2.195719000 | 0.616339000  |
| C | 0.668109000 | -3.451044000 | 0.446282000  |
| C | 1.421119000 | -4.524159000 | -0.030919000 |
| C | 2.755606000 | -4.293415000 | -0.371622000 |
| C | 3.328414000 | -3.039709000 | -0.206394000 |
| C | 0.807005000 | -5.866339000 | -0.221416000 |

|    |              |              |              |
|----|--------------|--------------|--------------|
| C  | 0.867187000  | -6.448846000 | -1.490876000 |
| C  | 0.257913000  | -7.666960000 | -1.760658000 |
| C  | -0.432614000 | -8.325188000 | -0.749623000 |
| C  | -0.483603000 | -7.769177000 | 0.520745000  |
| C  | 0.137143000  | -6.550047000 | 0.811649000  |
| C  | 0.082614000  | -6.062981000 | 2.204280000  |
| N  | -1.001812000 | -6.182032000 | 2.980572000  |
| N  | -0.629487000 | -5.679359000 | 4.160463000  |
| N  | 0.623506000  | -5.285458000 | 4.094712000  |
| N  | 1.104506000  | -5.514361000 | 2.870223000  |
| C  | 2.564240000  | 0.759024000  | 3.231409000  |
| C  | 1.790353000  | -0.400749000 | 3.874633000  |
| C  | 2.293814000  | -0.741547000 | 5.274605000  |
| C  | 1.473826000  | -1.841631000 | 5.942714000  |
| C  | 1.721445000  | 0.667463000  | -1.745383000 |
| O  | 0.755413000  | -0.324704000 | -2.067568000 |
| Cl | -0.037710000 | 3.262564000  | -0.449932000 |
| H  | 0.632356000  | -1.381948000 | 0.999504000  |
| H  | -0.375694000 | -3.601641000 | 0.699724000  |
| H  | 4.372057000  | -2.887994000 | -0.466504000 |
| H  | 3.357044000  | -5.110649000 | -0.756661000 |
| H  | 1.381892000  | -5.916972000 | -2.284977000 |
| H  | 0.313930000  | -8.092606000 | -2.757142000 |
| H  | -0.999544000 | -8.285670000 | 1.322587000  |
| H  | -0.920538000 | -9.274427000 | -0.945779000 |
| H  | 3.864102000  | -0.724726000 | 1.480367000  |
| H  | 3.979139000  | -0.435816000 | -0.238533000 |
| H  | 1.483879000  | 1.532145000  | -2.367644000 |
| H  | 2.731029000  | 0.339640000  | -2.022372000 |
| H  | 0.985909000  | -1.131641000 | -1.587355000 |
| H  | 3.632458000  | 0.519895000  | 3.196442000  |
| H  | 2.465091000  | 1.651012000  | 3.854889000  |
| H  | 0.728185000  | -0.132142000 | 3.919163000  |
| H  | 1.856706000  | -1.292258000 | 3.240771000  |
| H  | 3.345583000  | -1.046963000 | 5.214122000  |
| H  | 2.273122000  | 0.161968000  | 5.896299000  |
| H  | 0.432489000  | -1.528419000 | 6.069994000  |
| H  | 1.469660000  | -2.760805000 | 5.348204000  |
| H  | 1.869504000  | -2.084735000 | 6.932781000  |

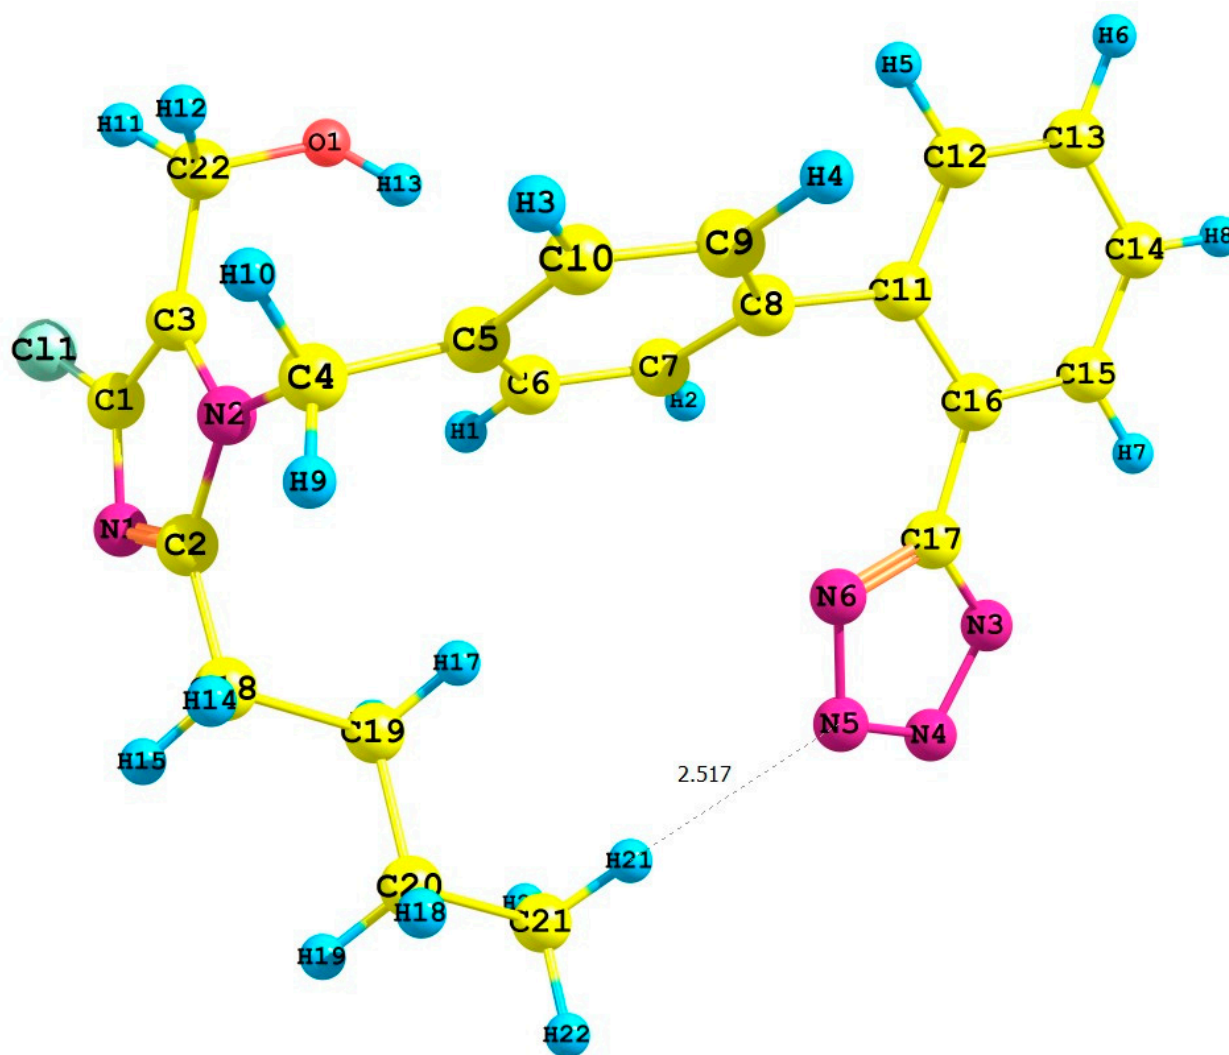

**Figure S7.** Optimized structure of the *syn*-losartan anion **1** (PBE1PBE/6-31G(d,p)/gas level of theory, Rotamer **VII**).

Cartesian coordinates:

|   |              |              |              |
|---|--------------|--------------|--------------|
| C | 4.609937000  | -0.571766000 | -0.707229000 |
| N | 4.526050000  | 0.770088000  | -0.524554000 |
| C | 3.576633000  | 0.933777000  | 0.387985000  |
| N | 3.064057000  | -0.276316000 | 0.792681000  |
| C | 3.730749000  | -1.275573000 | 0.081905000  |
| C | 2.044480000  | -0.504073000 | 1.811212000  |
| C | 0.667466000  | -0.873726000 | 1.286522000  |
| C | 0.266215000  | -0.590866000 | -0.026646000 |
| C | -1.056057000 | -0.781062000 | -0.417210000 |
| C | -2.016851000 | -1.258991000 | 0.483860000  |
| C | -1.592633000 | -1.603108000 | 1.774269000  |
| C | -0.270665000 | -1.411868000 | 2.172540000  |
| C | -3.440980000 | -1.432179000 | 0.079238000  |
| C | -3.988230000 | -2.723169000 | 0.159786000  |



|    |              |              |              |
|----|--------------|--------------|--------------|
| C  | -5.295973000 | -2.994022000 | -0.234135000 |
| C  | -6.083001000 | -1.948515000 | -0.723480000 |
| C  | -5.565614000 | -0.660906000 | -0.792837000 |
| C  | -4.247671000 | -0.360677000 | -0.388710000 |
| C  | -3.821968000 | 1.044156000  | -0.450411000 |
| N  | -4.537373000 | 1.985243000  | -1.105014000 |
| N  | -3.864904000 | 3.121376000  | -0.910195000 |
| N  | -2.789441000 | 2.876848000  | -0.159409000 |
| N  | -2.736398000 | 1.576121000  | 0.145973000  |
| C  | 3.111712000  | 2.275312000  | 0.872999000  |
| C  | 1.850932000  | 2.816445000  | 0.161877000  |
| C  | 1.455067000  | 4.217289000  | 0.645177000  |
| C  | 0.259983000  | 4.798825000  | -0.118282000 |
| C  | 3.433626000  | -2.736091000 | 0.193523000  |
| O  | 2.347093000  | -3.192766000 | -0.606437000 |
| Cl | 5.760790000  | -1.260509000 | -1.823349000 |
| H  | 0.978974000  | -0.181937000 | -0.735969000 |
| H  | -1.359525000 | -0.517370000 | -1.424039000 |
| H  | 0.024099000  | -1.652312000 | 3.192432000  |
| H  | -2.318884000 | -1.988173000 | 2.484268000  |
| H  | -3.354021000 | -3.530568000 | 0.518187000  |
| H  | -5.689510000 | -4.005095000 | -0.168764000 |
| H  | -6.168806000 | 0.165000000  | -1.153848000 |
| H  | -7.105496000 | -2.136021000 | -1.043291000 |
| H  | 1.971544000  | 0.417385000  | 2.396015000  |
| H  | 2.408879000  | -1.275441000 | 2.499611000  |
| H  | 4.311513000  | -3.284425000 | -0.157663000 |
| H  | 3.285372000  | -3.009223000 | 1.251324000  |
| H  | 1.560389000  | -2.683047000 | -0.358583000 |
| H  | 2.940640000  | 2.255760000  | 1.957579000  |
| H  | 3.945315000  | 2.963730000  | 0.701789000  |
| H  | 2.047877000  | 2.840184000  | -0.917534000 |
| H  | 1.005368000  | 2.134913000  | 0.308102000  |
| H  | 1.218715000  | 4.172143000  | 1.718002000  |
| H  | 2.323373000  | 4.887434000  | 0.553145000  |
| H  | 0.491954000  | 4.891954000  | -1.186349000 |
| H  | -0.638400000 | 4.176265000  | -0.025564000 |
| H  | 0.013558000  | 5.800839000  | 0.251490000  |

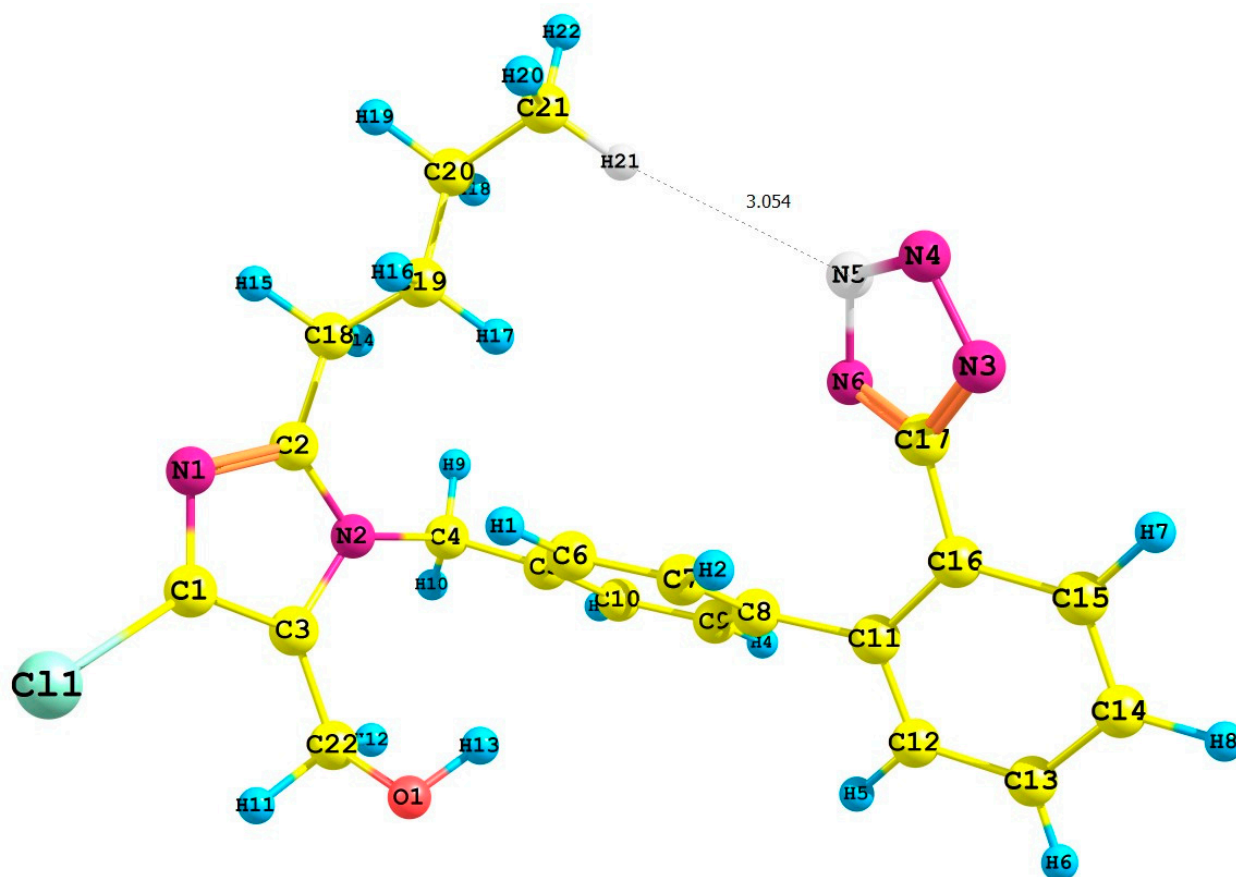

**Figure S8.** Optimized structure of the *syn*-losartan anion **1** (PBE1PBE/6-31G(d,p)/CPCM level of theory, Rotamer **VIII**).

Cartesian coordinates:

|   |             |              |              |
|---|-------------|--------------|--------------|
| C | 0.181920000 | 0.055362000  | -0.112714000 |
| N | 0.040662000 | 0.112880000  | 1.232423000  |
| C | 1.277047000 | 0.061336000  | 1.704804000  |
| N | 2.187833000 | -0.024094000 | 0.692201000  |
| C | 1.492830000 | -0.026907000 | -0.507061000 |
| C | 3.632256000 | -0.072531000 | 0.816095000  |
| C | 4.240220000 | -1.416688000 | 0.483948000  |
| C | 3.509664000 | -2.605629000 | 0.581374000  |
| C | 4.126592000 | -3.833591000 | 0.368859000  |
| C | 5.487720000 | -3.910897000 | 0.056589000  |
| C | 6.203188000 | -2.716367000 | -0.079856000 |
| C | 5.589313000 | -1.486711000 | 0.131601000  |
| C | 6.144317000 | -5.221661000 | -0.173844000 |
| C | 6.805000000 | -5.429717000 | -1.391068000 |
| C | 7.376676000 | -6.656946000 | -1.707988000 |
| C | 7.289235000 | -7.708199000 | -0.798788000 |
| C | 6.657632000 | -7.510421000 | 0.423057000  |
| C | 6.090589000 | -6.274932000 | 0.765175000  |

|    |              |              |              |
|----|--------------|--------------|--------------|
| C  | 5.503501000  | -6.133596000 | 2.107560000  |
| N  | 4.831171000  | -7.119375000 | 2.721476000  |
| N  | 4.521009000  | -6.619900000 | 3.917439000  |
| N  | 4.993782000  | -5.394992000 | 4.021370000  |
| N  | 5.620792000  | -5.055288000 | 2.895739000  |
| C  | 1.612162000  | 0.055400000  | 3.159464000  |
| C  | 1.900453000  | -1.342785000 | 3.721691000  |
| C  | 2.188227000  | -1.330010000 | 5.219035000  |
| C  | 2.410578000  | -2.727085000 | 5.785821000  |
| C  | 2.117367000  | -0.157570000 | -1.853786000 |
| O  | 2.293165000  | -1.497800000 | -2.283781000 |
| Cl | -1.193080000 | 0.100405000  | -1.157734000 |
| H  | 2.452474000  | -2.574296000 | 0.831011000  |
| H  | 3.546107000  | -4.747092000 | 0.455918000  |
| H  | 6.169718000  | -0.572415000 | 0.035157000  |
| H  | 7.258526000  | -2.752316000 | -0.335757000 |
| H  | 6.840410000  | -4.615944000 | -2.110632000 |
| H  | 7.875792000  | -6.793202000 | -2.662871000 |
| H  | 6.607746000  | -8.314823000 | 1.150669000  |
| H  | 7.723134000  | -8.675757000 | -1.034303000 |
| H  | 3.879082000  | 0.197647000  | 1.846601000  |
| H  | 4.068477000  | 0.706732000  | 0.183111000  |
| H  | 1.449351000  | 0.308698000  | -2.582647000 |
| H  | 3.064287000  | 0.399254000  | -1.886473000 |
| H  | 2.927662000  | -1.913230000 | -1.685246000 |
| H  | 2.459538000  | 0.721300000  | 3.364279000  |
| H  | 0.748675000  | 0.484594000  | 3.676784000  |
| H  | 1.037497000  | -1.989664000 | 3.516652000  |
| H  | 2.752673000  | -1.790624000 | 3.194550000  |
| H  | 3.070387000  | -0.705035000 | 5.411585000  |
| H  | 1.352533000  | -0.847925000 | 5.743671000  |
| H  | 1.518568000  | -3.349349000 | 5.652162000  |
| H  | 3.243795000  | -3.237209000 | 5.289217000  |
| H  | 2.631756000  | -2.690884000 | 6.857142000  |

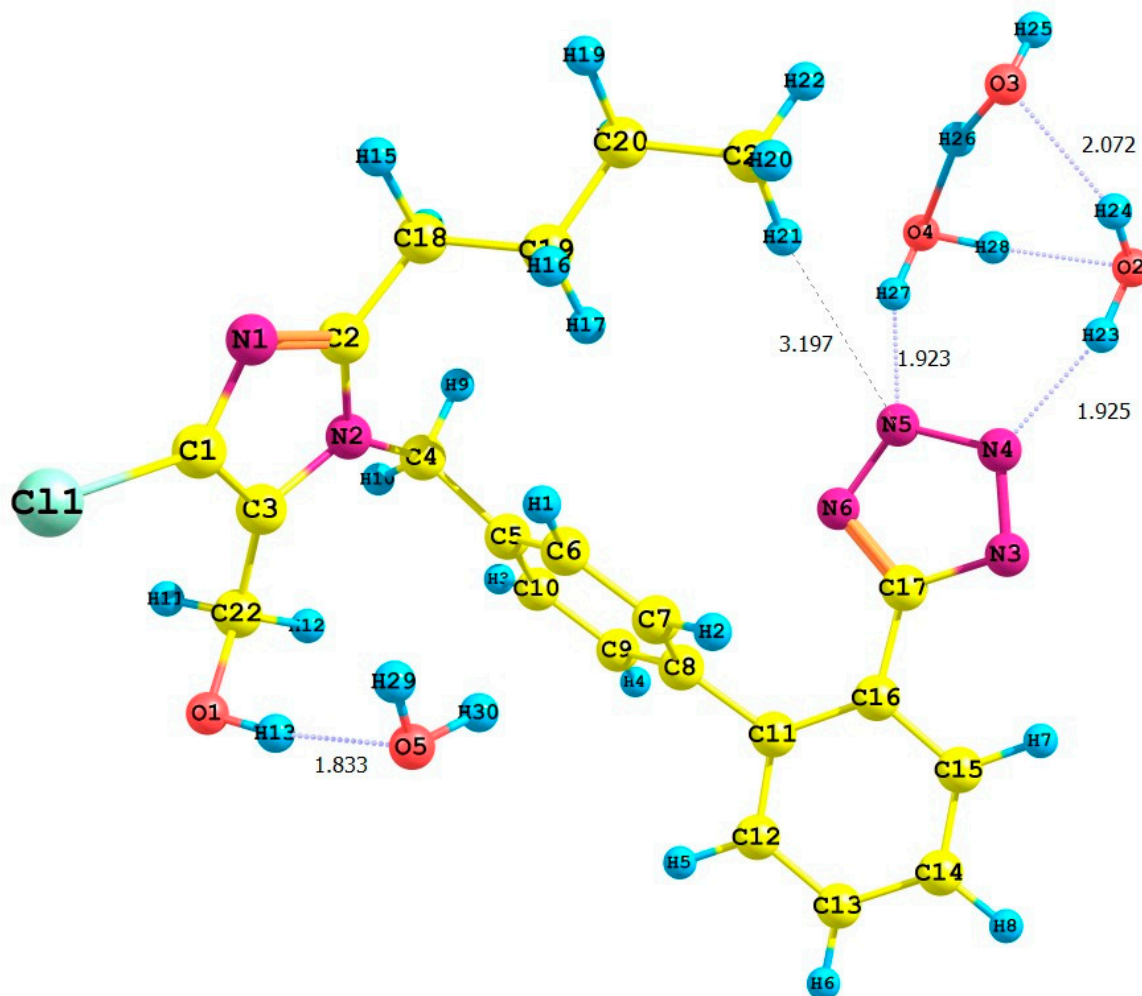

**Figure S9.** Optimized structure of the *syn*-losartan anion cluster **1** with water molecules (**IX**); interaction of **1** with three water molecules (B3LYP/6-31G(d,p) level of theory, gas).

Cartesian coordinates:

|   |              |              |              |
|---|--------------|--------------|--------------|
| C | -4.703337000 | -2.175466000 | 0.125652000  |
| N | -5.007321000 | -0.879210000 | 0.405212000  |
| C | -4.221845000 | -0.160575000 | -0.382799000 |
| N | -3.416841000 | -0.972915000 | -1.151518000 |
| C | -3.721215000 | -2.297589000 | -0.831649000 |
| C | -2.410224000 | -0.540348000 | -2.119200000 |
| C | -0.969661000 | -0.712566000 | -1.668853000 |
| C | -0.590629000 | -0.523317000 | -0.331925000 |
| C | 0.752420000  | -0.528598000 | 0.034216000  |
| C | 1.761060000  | -0.729105000 | -0.921379000 |
| C | 1.374321000  | -0.976929000 | -2.242336000 |
| C | 0.028166000  | -0.963277000 | -2.612335000 |
| C | 3.198722000  | -0.713090000 | -0.525539000 |
| C | 3.928116000  | -1.905884000 | -0.647478000 |
| C | 5.257461000  | -1.994670000 | -0.241685000 |

|    |              |              |              |
|----|--------------|--------------|--------------|
| C  | 5.878237000  | -0.868216000 | 0.301707000  |
| C  | 5.177676000  | 0.327748000  | 0.409597000  |
| C  | 3.837394000  | 0.441335000  | -0.007111000 |
| C  | 3.203770000  | 1.766669000  | 0.080897000  |
| N  | 3.725954000  | 2.770614000  | 0.817000000  |
| N  | 2.920677000  | 3.802388000  | 0.589602000  |
| N  | 1.953266000  | 3.441329000  | -0.253006000 |
| N  | 2.106009000  | 2.163030000  | -0.592476000 |
| C  | -4.228587000 | 1.341532000  | -0.414431000 |
| C  | -3.083896000 | 2.017598000  | 0.368464000  |
| C  | -3.172657000 | 3.547938000  | 0.397048000  |
| C  | -2.014981000 | 4.178344000  | 1.177490000  |
| C  | -3.119034000 | -3.496550000 | -1.522802000 |
| O  | -2.778614000 | -4.555972000 | -0.659137000 |
| Cl | -5.549030000 | -3.475390000 | 0.919838000  |
| H  | -1.349692000 | -0.331660000 | 0.419825000  |
| H  | 1.031590000  | -0.333649000 | 1.064833000  |
| H  | -0.242715000 | -1.125851000 | -3.653412000 |
| H  | 2.138411000  | -1.146085000 | -2.995129000 |
| H  | 3.424215000  | -2.782463000 | -1.046673000 |
| H  | 5.796489000  | -2.933048000 | -0.339721000 |
| H  | 5.652478000  | 1.216955000  | 0.809633000  |
| H  | 6.912896000  | -0.918139000 | 0.631359000  |
| H  | -2.603345000 | 0.517423000  | -2.320504000 |
| H  | -2.573481000 | -1.069316000 | -3.063810000 |
| H  | -3.849229000 | -3.909962000 | -2.231246000 |
| H  | -2.256189000 | -3.162925000 | -2.120781000 |
| H  | -2.113793000 | -4.220218000 | -0.022800000 |
| H  | -4.225696000 | 1.703422000  | -1.451640000 |
| H  | -5.188945000 | 1.640895000  | 0.016418000  |
| H  | -3.088966000 | 1.630757000  | 1.396152000  |
| H  | -2.117086000 | 1.736901000  | -0.063382000 |
| H  | -3.172277000 | 3.928280000  | -0.634042000 |
| H  | -4.135019000 | 3.850495000  | 0.834614000  |
| H  | -2.028808000 | 3.854797000  | 2.225234000  |
| H  | -1.047437000 | 3.885206000  | 0.756176000  |
| H  | -2.048711000 | 5.270672000  | 1.167281000  |
| O  | 2.815847000  | 6.666489000  | 0.861358000  |
| H  | 2.989576000  | 5.698086000  | 0.915514000  |
| H  | 1.956421000  | 6.768219000  | 1.308472000  |
| O  | -0.099839000 | 6.992744000  | 1.189685000  |
| H  | -0.132831000 | 7.920454000  | 0.922871000  |

|   |              |              |              |
|---|--------------|--------------|--------------|
| H | 0.103756000  | 6.528610000  | 0.335551000  |
| O | 0.943614000  | 5.971280000  | -1.106913000 |
| H | 1.096054000  | 5.008160000  | -0.964915000 |
| H | 1.760639000  | 6.343915000  | -0.710728000 |
| O | -1.061928000 | -3.358390000 | 1.205634000  |
| H | -1.755992000 | -2.879046000 | 1.678060000  |
| H | -0.556331000 | -2.661934000 | 0.756264000  |

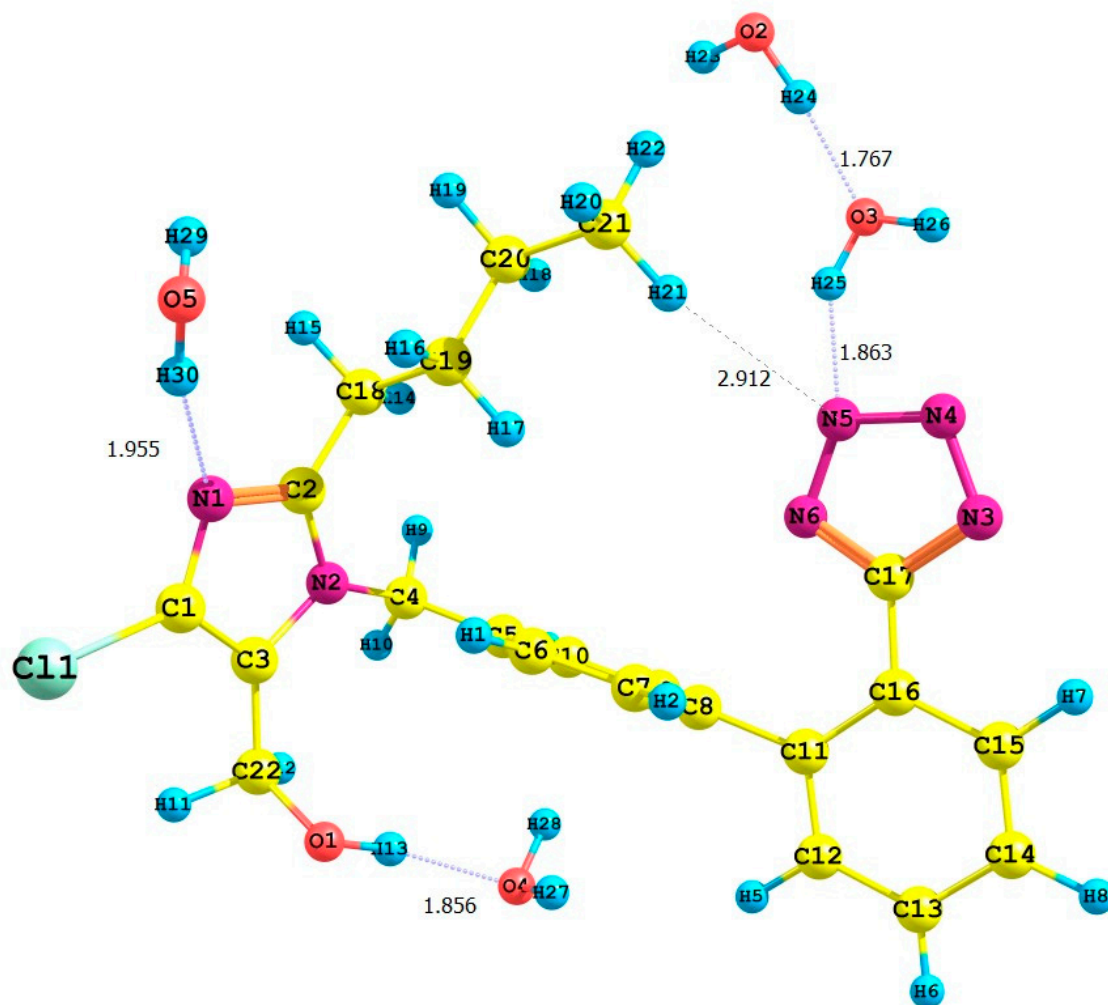

**Figure S10.** Optimized structure of the *syn*-losartan anion cluster **1** with water molecules (**X**); interaction of **1** with three water molecules (PBE1PBE/6-31G(d,p) level of theory, gas).

Cartesian coordinates:

|   |              |              |              |
|---|--------------|--------------|--------------|
| C | -2.306827000 | -1.280895000 | -1.927300000 |
| N | -2.806570000 | -0.380853000 | -1.046412000 |
| C | -2.528295000 | 0.805461000  | -1.561722000 |
| N | -1.871590000 | 0.673886000  | -2.751087000 |
| C | -1.712678000 | -0.681585000 | -3.007344000 |
| C | -1.433028000 | 1.743821000  | -3.619838000 |
| C | 0.002312000  | 2.177461000  | -3.430694000 |

|    |              |              |              |
|----|--------------|--------------|--------------|
| C  | 0.805317000  | 1.684746000  | -2.404315000 |
| C  | 2.108490000  | 2.145932000  | -2.248968000 |
| C  | 2.647091000  | 3.095962000  | -3.119892000 |
| C  | 1.845556000  | 3.567905000  | -4.164511000 |
| C  | 0.535978000  | 3.120844000  | -4.312204000 |
| C  | 4.064223000  | 3.527787000  | -2.993378000 |
| C  | 4.980248000  | 3.008180000  | -3.914622000 |
| C  | 6.334353000  | 3.311176000  | -3.841023000 |
| C  | 6.784419000  | 4.150971000  | -2.824210000 |
| C  | 5.885356000  | 4.686182000  | -1.914119000 |
| C  | 4.512249000  | 4.398391000  | -1.978433000 |
| C  | 3.623918000  | 5.044673000  | -1.012268000 |
| N  | 4.085843000  | 5.735884000  | 0.045013000  |
| N  | 3.002255000  | 6.200827000  | 0.638012000  |
| N  | 1.931157000  | 5.809557000  | -0.035205000 |
| N  | 2.285533000  | 5.081085000  | -1.081278000 |
| C  | -2.850502000 | 2.097043000  | -0.886572000 |
| C  | -1.832877000 | 2.494152000  | 0.193339000  |
| C  | -2.185157000 | 3.811992000  | 0.875009000  |
| C  | -1.137526000 | 4.242184000  | 1.894364000  |
| C  | -0.982133000 | -1.274789000 | -4.168314000 |
| O  | 0.403742000  | -1.390126000 | -3.967316000 |
| Cl | -2.462876000 | -2.974334000 | -1.656413000 |
| H  | 0.416866000  | 0.928786000  | -1.729120000 |
| H  | 2.718027000  | 1.773802000  | -1.431097000 |
| H  | -0.078546000 | 3.516540000  | -5.119039000 |
| H  | 2.248997000  | 4.308898000  | -4.848249000 |
| H  | 4.612019000  | 2.338965000  | -4.690153000 |
| H  | 7.028494000  | 2.891205000  | -4.563761000 |
| H  | 6.214700000  | 5.353628000  | -1.124030000 |
| H  | 7.840549000  | 4.396206000  | -2.745134000 |
| H  | -2.098242000 | 2.597310000  | -3.457558000 |
| H  | -1.597192000 | 1.425077000  | -4.655363000 |
| H  | -1.391985000 | -2.282577000 | -4.307342000 |
| H  | -1.218114000 | -0.716760000 | -5.087480000 |
| H  | 0.880509000  | -0.696380000 | -4.457983000 |
| H  | -2.942856000 | 2.906048000  | -1.620669000 |
| H  | -3.839659000 | 1.983169000  | -0.428003000 |
| H  | -1.792350000 | 1.686503000  | 0.934833000  |
| H  | -0.836099000 | 2.580747000  | -0.255378000 |
| H  | -2.294396000 | 4.596383000  | 0.112297000  |
| H  | -3.168460000 | 3.717663000  | 1.359525000  |

|   |              |              |              |
|---|--------------|--------------|--------------|
| H | -1.009181000 | 3.474387000  | 2.666156000  |
| H | -0.167751000 | 4.400224000  | 1.409895000  |
| H | -1.411901000 | 5.180088000  | 2.388420000  |
| O | -1.677242000 | 7.495227000  | 2.994932000  |
| H | -2.323748000 | 7.508340000  | 2.284326000  |
| H | -0.828667000 | 7.545941000  | 2.500590000  |
| O | 0.536564000  | 7.692188000  | 1.387761000  |
| H | 0.694777000  | 6.960682000  | 0.750597000  |
| H | 1.404623000  | 7.722060000  | 1.806982000  |
| O | 2.214160000  | 0.394223000  | -5.149489000 |
| H | 2.762183000  | 0.319919000  | -4.359858000 |
| H | 1.884382000  | 1.302476000  | -5.086224000 |
| O | -3.167550000 | -0.309747000 | 1.840474000  |
| H | -3.879065000 | 0.334354000  | 1.881031000  |
| H | -3.081132000 | -0.487935000 | 0.886074000  |

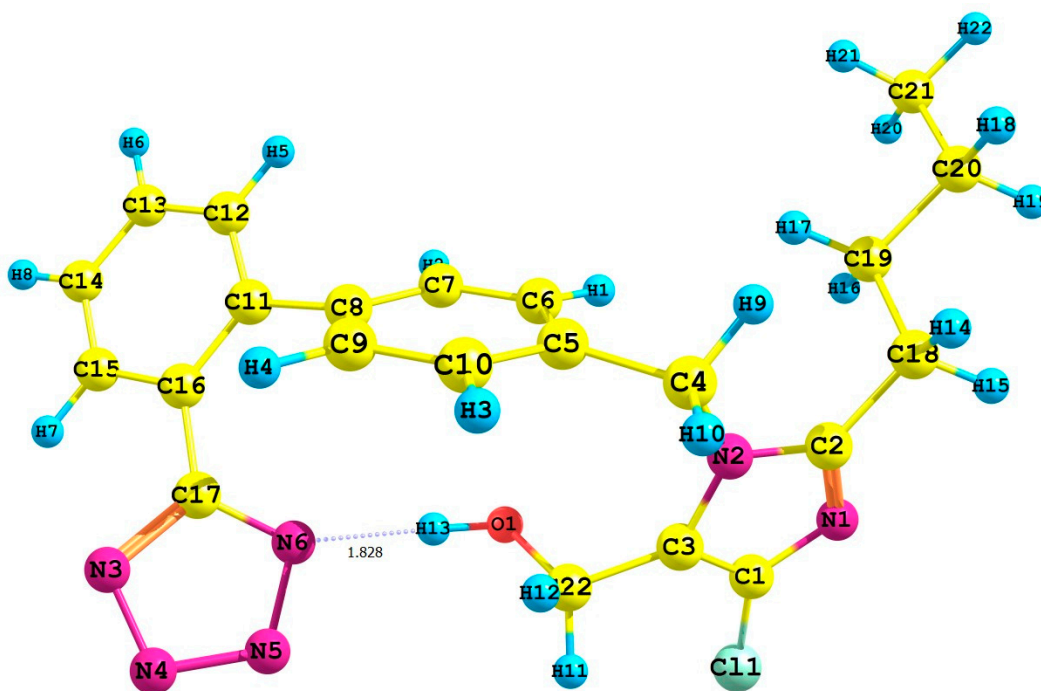

**Figure S11.** Optimized structure of the *anti*-losartan anion **1** (B3LYP/6-31G(d,p)/gas level of theory, Rotamer **XI**).

Cartesian coordinates:

|   |              |              |              |
|---|--------------|--------------|--------------|
| C | -3.643676000 | -1.681373000 | 0.592262000  |
| N | -4.375550000 | -0.534480000 | 0.594284000  |
| C | -3.790541000 | 0.234100000  | -0.310078000 |
| N | -2.703100000 | -0.388323000 | -0.878465000 |
| C | -2.598293000 | -1.659045000 | -0.301727000 |
| C | -1.937678000 | 0.130864000  | -2.022860000 |



|    |              |              |              |
|----|--------------|--------------|--------------|
| C  | -0.437784000 | 0.012749000  | -1.875963000 |
| C  | 0.227771000  | 0.519356000  | -0.757629000 |
| C  | 1.578746000  | 0.248510000  | -0.561099000 |
| C  | 2.291969000  | -0.546148000 | -1.468989000 |
| C  | 1.644080000  | -0.962934000 | -2.639712000 |
| C  | 0.297351000  | -0.685822000 | -2.838379000 |
| C  | 3.690886000  | -0.963964000 | -1.184144000 |
| C  | 4.651098000  | 0.027166000  | -0.925925000 |
| C  | 5.988730000  | -0.288530000 | -0.701664000 |
| C  | 6.384989000  | -1.627019000 | -0.738049000 |
| C  | 5.443352000  | -2.623664000 | -0.970355000 |
| C  | 4.082414000  | -2.327905000 | -1.182682000 |
| C  | 3.170443000  | -3.470731000 | -1.380706000 |
| N  | 3.605432000  | -4.632500000 | -1.903798000 |
| N  | 2.534835000  | -5.439013000 | -1.896419000 |
| N  | 1.497278000  | -4.799046000 | -1.380186000 |
| N  | 1.864744000  | -3.551751000 | -1.045288000 |
| C  | -4.259030000 | 1.625540000  | -0.621220000 |
| C  | -3.426881000 | 2.739453000  | 0.046333000  |
| C  | -3.983122000 | 4.143076000  | -0.219758000 |
| C  | -3.166662000 | 5.251845000  | 0.451179000  |
| C  | -1.518994000 | -2.674133000 | -0.561921000 |
| O  | -0.375262000 | -2.370757000 | 0.199493000  |
| Cl | -4.068321000 | -3.003288000 | 1.649597000  |
| H  | -0.329334000 | 1.053818000  | 0.007181000  |
| H  | 2.068812000  | 0.583551000  | 0.348396000  |
| H  | -0.204131000 | -1.071186000 | -3.723448000 |
| H  | 2.186169000  | -1.562022000 | -3.363376000 |
| H  | 4.334010000  | 1.067140000  | -0.931907000 |
| H  | 6.712175000  | 0.500301000  | -0.511847000 |
| H  | 5.732535000  | -3.668742000 | -0.988486000 |
| H  | 7.425805000  | -1.895678000 | -0.573907000 |
| H  | -2.239716000 | 1.174682000  | -2.143555000 |
| H  | -2.254632000 | -0.399086000 | -2.929182000 |
| H  | -1.941946000 | -3.656332000 | -0.297371000 |
| H  | -1.298333000 | -2.715564000 | -1.638676000 |
| H  | 0.424422000  | -2.768259000 | -0.237420000 |
| H  | -4.302199000 | 1.798466000  | -1.705091000 |
| H  | -5.289126000 | 1.681018000  | -0.255820000 |
| H  | -3.396638000 | 2.549999000  | 1.126502000  |
| H  | -2.386334000 | 2.688805000  | -0.301509000 |
| H  | -4.019940000 | 4.320708000  | -1.303794000 |

|   |              |             |             |
|---|--------------|-------------|-------------|
| H | -5.023597000 | 4.190743000 | 0.129943000 |
| H | -3.138424000 | 5.118219000 | 1.538441000 |
| H | -2.130703000 | 5.252334000 | 0.093708000 |
| H | -3.589374000 | 6.241746000 | 0.247849000 |

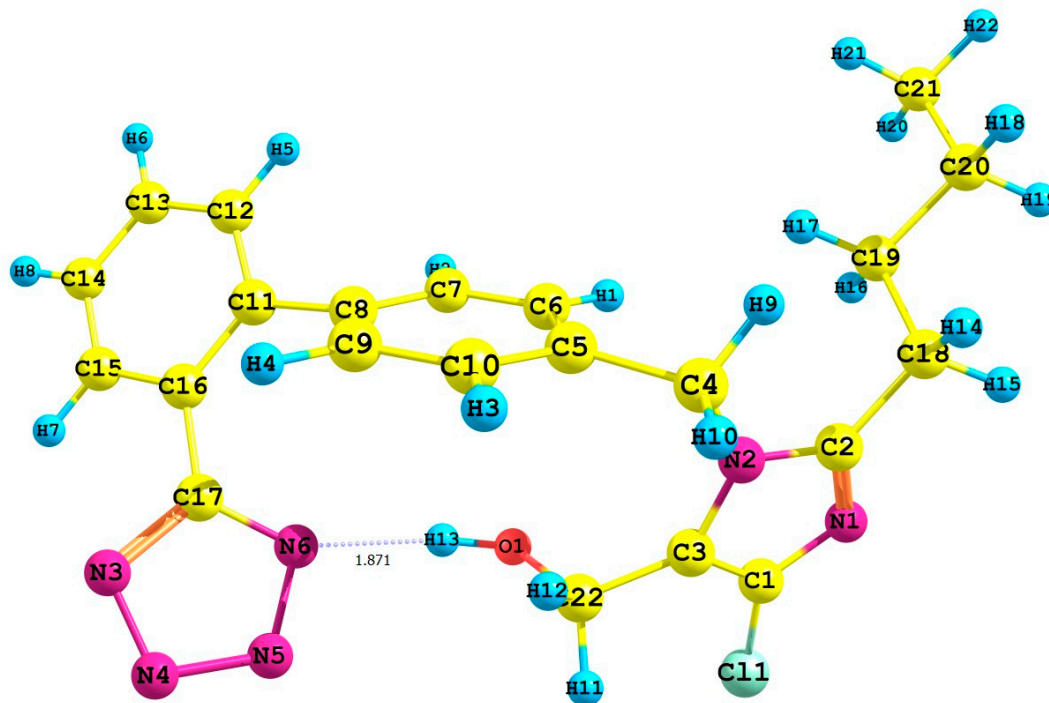

**Figure S12.** Optimized structure of the *anti*-losartan anion **1** (B3LYP/6-31G(d,p)/CPCM level of theory, Rotamer **XII**).

Cartesian coordinates

|   |              |              |              |
|---|--------------|--------------|--------------|
| C | -3.636647000 | -1.682024000 | 0.592163000  |
| N | -4.346613000 | -0.524124000 | 0.626796000  |
| C | -3.780618000 | 0.243709000  | -0.298001000 |
| N | -2.726943000 | -0.396306000 | -0.902997000 |
| C | -2.625574000 | -1.670894000 | -0.338038000 |
| C | -1.962126000 | 0.117855000  | -2.053415000 |
| C | -0.463385000 | -0.017812000 | -1.890501000 |
| C | 0.192021000  | 0.468558000  | -0.755296000 |
| C | 1.545218000  | 0.206707000  | -0.555291000 |
| C | 2.271568000  | -0.558908000 | -1.479074000 |
| C | 1.633767000  | -0.959640000 | -2.661137000 |
| C | 0.283351000  | -0.691808000 | -2.863015000 |
| C | 3.679313000  | -0.950977000 | -1.195682000 |
| C | 4.626106000  | 0.058002000  | -0.956354000 |
| C | 5.967941000  | -0.237236000 | -0.724301000 |
| C | 6.386287000  | -1.568886000 | -0.728214000 |
| C | 5.457062000  | -2.583309000 | -0.942317000 |

|    |              |              |              |
|----|--------------|--------------|--------------|
| C  | 4.096079000  | -2.305593000 | -1.168430000 |
| C  | 3.191592000  | -3.464966000 | -1.342514000 |
| N  | 3.608644000  | -4.611993000 | -1.911075000 |
| N  | 2.556407000  | -5.443318000 | -1.837322000 |
| N  | 1.547893000  | -4.830734000 | -1.243596000 |
| N  | 1.915377000  | -3.578598000 | -0.918635000 |
| C  | -4.240625000 | 1.639357000  | -0.600549000 |
| C  | -3.389473000 | 2.744433000  | 0.059583000  |
| C  | -3.942441000 | 4.150039000  | -0.202700000 |
| C  | -3.108603000 | 5.252991000  | 0.455792000  |
| C  | -1.588640000 | -2.712668000 | -0.635962000 |
| O  | -0.484573000 | -2.586425000 | 0.250513000  |
| Cl | -4.037269000 | -3.007025000 | 1.661460000  |
| H  | -0.367206000 | 1.007159000  | 0.004608000  |
| H  | 2.030964000  | 0.547405000  | 0.354495000  |
| H  | -0.206208000 | -1.047607000 | -3.766020000 |
| H  | 2.189056000  | -1.520817000 | -3.406044000 |
| H  | 4.298063000  | 1.093311000  | -0.979268000 |
| H  | 6.679029000  | 0.564815000  | -0.550361000 |
| H  | 5.771529000  | -3.621215000 | -0.925147000 |
| H  | 7.428715000  | -1.818440000 | -0.553434000 |
| H  | -2.248459000 | 1.163986000  | -2.175714000 |
| H  | -2.285799000 | -0.410451000 | -2.955668000 |
| H  | -2.074209000 | -3.693036000 | -0.514569000 |
| H  | -1.276359000 | -2.644025000 | -1.683217000 |
| H  | 0.347854000  | -2.834223000 | -0.219250000 |
| H  | -4.290855000 | 1.806798000  | -1.683009000 |
| H  | -5.267396000 | 1.708965000  | -0.228871000 |
| H  | -3.346439000 | 2.558816000  | 1.140346000  |
| H  | -2.354952000 | 2.688166000  | -0.304175000 |
| H  | -3.991079000 | 4.323005000  | -1.286148000 |
| H  | -4.976934000 | 4.203452000  | 0.162026000  |
| H  | -3.067629000 | 5.122162000  | 1.543028000  |
| H  | -2.078293000 | 5.246950000  | 0.082414000  |
| H  | -3.529763000 | 6.243315000  | 0.254849000  |

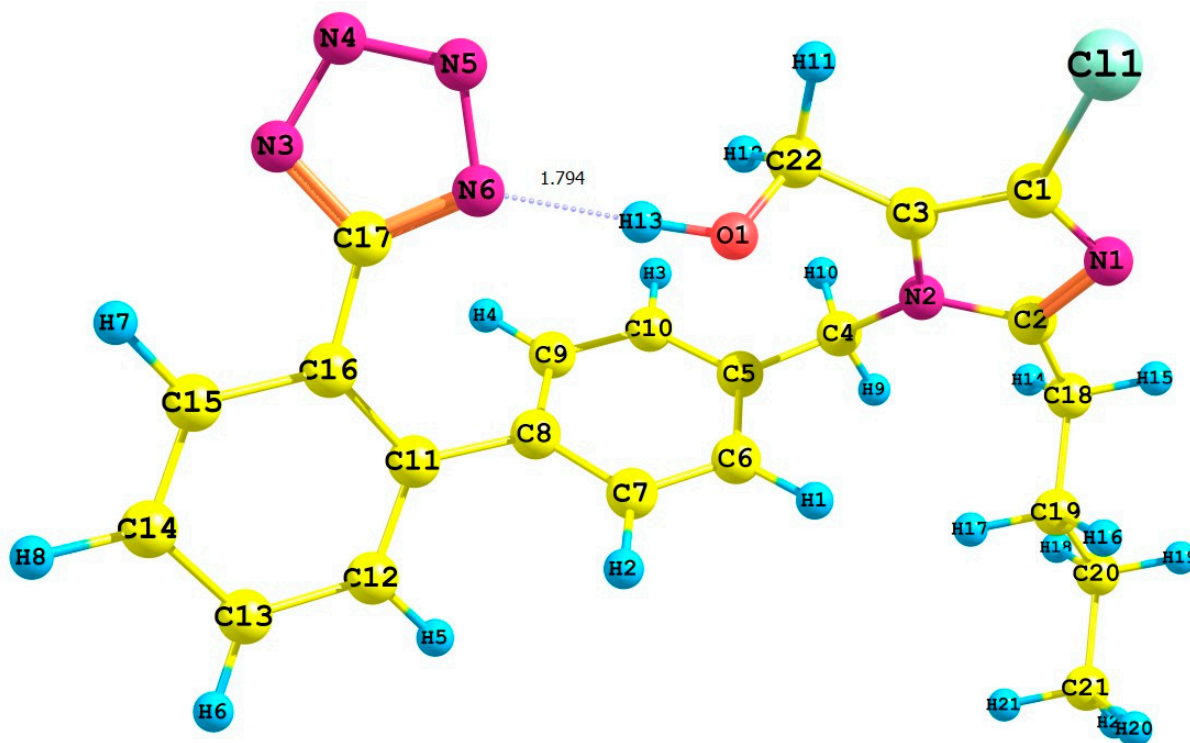

**Figure S13.** Optimized structure of the *anti*-losartan anion **1** (PBE1PBE/6-31G(d,p)/gas level of theory, Rotamer **XIII**).

Cartesian coordinates:

|   |             |              |              |
|---|-------------|--------------|--------------|
| C | 0.903040000 | -0.303934000 | -0.391257000 |
| N | 0.453805000 | 0.099051000  | 0.822609000  |
| C | 1.517227000 | 0.043815000  | 1.600283000  |
| N | 2.620674000 | -0.388920000 | 0.918456000  |
| C | 2.240290000 | -0.614921000 | -0.398865000 |
| C | 3.978649000 | -0.420376000 | 1.449686000  |
| C | 4.720753000 | -1.693419000 | 1.144650000  |
| C | 4.178178000 | -2.938286000 | 1.453660000  |
| C | 4.793771000 | -4.100130000 | 1.007938000  |
| C | 5.952889000 | -4.041398000 | 0.229835000  |
| C | 6.543375000 | -2.794786000 | 0.004944000  |
| C | 5.933523000 | -1.636739000 | 0.459302000  |
| C | 6.526399000 | -5.265860000 | -0.374078000 |
| C | 6.830357000 | -6.349888000 | 0.457653000  |
| C | 7.416703000 | -7.507572000 | -0.037922000 |
| C | 7.712855000 | -7.588415000 | -1.396719000 |
| C | 7.397608000 | -6.531298000 | -2.238211000 |
| C | 6.788728000 | -5.360137000 | -1.759679000 |
| C | 6.465540000 | -4.323041000 | -2.750183000 |
| N | 7.169475000 | -4.196574000 | -3.883647000 |
| N | 6.581167000 | -3.202939000 | -4.543817000 |

|    |              |              |              |
|----|--------------|--------------|--------------|
| N  | 5.558930000  | -2.751419000 | -3.851567000 |
| N  | 5.457238000  | -3.434676000 | -2.712988000 |
| C  | 1.481267000  | 0.374226000  | 3.056807000  |
| C  | 1.454685000  | -0.853504000 | 3.974528000  |
| C  | 1.336516000  | -0.489109000 | 5.450511000  |
| C  | 1.302780000  | -1.708949000 | 6.362582000  |
| C  | 3.105485000  | -1.162491000 | -1.492916000 |
| O  | 3.151469000  | -2.554985000 | -1.418689000 |
| Cl | -0.168105000 | -0.383488000 | -1.743860000 |
| H  | 3.222643000  | -2.998389000 | 1.968773000  |
| H  | 4.325570000  | -5.063959000 | 1.187658000  |
| H  | 6.372391000  | -0.669932000 | 0.221224000  |
| H  | 7.451088000  | -2.735735000 | -0.586905000 |
| H  | 6.622675000  | -6.257531000 | 1.521236000  |
| H  | 7.649816000  | -8.331783000 | 0.631278000  |
| H  | 7.607954000  | -6.579578000 | -3.301892000 |
| H  | 8.180215000  | -8.481666000 | -1.804001000 |
| H  | 3.893088000  | -0.260783000 | 2.528719000  |
| H  | 4.538850000  | 0.431472000  | 1.044739000  |
| H  | 2.669214000  | -0.809184000 | -2.441763000 |
| H  | 4.107062000  | -0.709229000 | -1.430101000 |
| H  | 3.980943000  | -2.879861000 | -1.858051000 |
| H  | 2.317827000  | 1.028690000  | 3.338108000  |
| H  | 0.566337000  | 0.955728000  | 3.206998000  |
| H  | 0.611059000  | -1.489611000 | 3.678647000  |
| H  | 2.358988000  | -1.457725000 | 3.819950000  |
| H  | 2.177526000  | 0.159068000  | 5.733564000  |
| H  | 0.428790000  | 0.110770000  | 5.601646000  |
| H  | 0.453333000  | -2.357065000 | 6.120945000  |
| H  | 2.213378000  | -2.308052000 | 6.253140000  |
| H  | 1.215877000  | -1.423884000 | 7.416107000  |

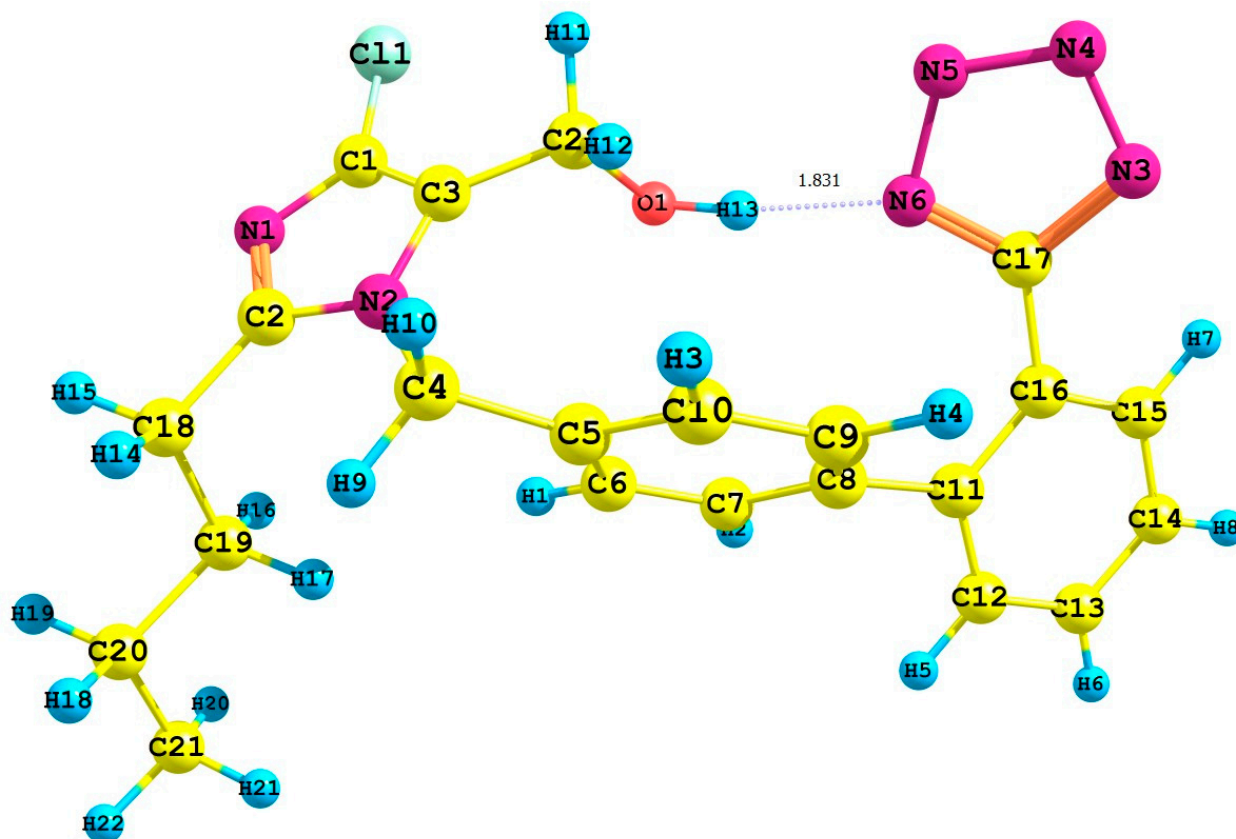

**Figure S14.** Optimized structure of the *anti*-losartan anion **1** (PBE1PBE/6-31G(d,p)/CPCM level of theory, Rotamer **XIV**).

Cartesian coordinates:

|   |              |              |              |
|---|--------------|--------------|--------------|
| C | 3.108872000  | -2.248987000 | -0.572774000 |
| N | 4.233973000  | -1.497138000 | -0.523221000 |
| C | 3.918305000  | -0.480233000 | 0.263268000  |
| N | 2.627331000  | -0.568395000 | 0.698019000  |
| C | 2.079504000  | -1.729487000 | 0.169387000  |
| C | 1.992739000  | 0.323190000  | 1.665904000  |
| C | 0.630611000  | 0.792870000  | 1.225747000  |
| C | 0.437550000  | 1.368157000  | -0.029516000 |
| C | -0.843879000 | 1.661680000  | -0.478572000 |
| C | -1.960290000 | 1.370667000  | 0.311657000  |
| C | -1.755401000 | 0.878396000  | 1.603868000  |
| C | -0.474067000 | 0.594597000  | 2.054823000  |
| C | -3.329949000 | 1.558375000  | -0.222131000 |
| C | -3.703168000 | 2.820593000  | -0.699377000 |
| C | -4.985313000 | 3.069488000  | -1.175303000 |
| C | -5.924294000 | 2.041024000  | -1.179800000 |
| C | -5.563116000 | 0.777341000  | -0.730349000 |
| C | -4.271068000 | 0.505959000  | -0.256186000 |

|    |              |              |              |
|----|--------------|--------------|--------------|
| C  | -3.984341000 | -0.881373000 | 0.153644000  |
| N  | -4.929974000 | -1.676216000 | 0.674292000  |
| N  | -4.332511000 | -2.853208000 | 0.855864000  |
| N  | -3.084372000 | -2.782600000 | 0.457902000  |
| N  | -2.829781000 | -1.552942000 | 0.009439000  |
| C  | 4.860390000  | 0.630656000  | 0.592318000  |
| C  | 4.620695000  | 1.910651000  | -0.218171000 |
| C  | 5.648302000  | 2.995893000  | 0.084610000  |
| C  | 5.415873000  | 4.268131000  | -0.720278000 |
| C  | 0.671489000  | -2.208219000 | 0.318467000  |
| O  | -0.129037000 | -1.723126000 | -0.733556000 |
| Cl | 3.056180000  | -3.706971000 | -1.503772000 |
| H  | 1.288294000  | 1.536397000  | -0.684945000 |
| H  | -0.987556000 | 2.064714000  | -1.477479000 |
| H  | -0.333024000 | 0.171775000  | 3.046837000  |
| H  | -2.610391000 | 0.678247000  | 2.242832000  |
| H  | -2.971675000 | 3.623781000  | -0.668895000 |
| H  | -5.250164000 | 4.060636000  | -1.531640000 |
| H  | -6.280733000 | -0.036712000 | -0.751637000 |
| H  | -6.932161000 | 2.218308000  | -1.543830000 |
| H  | 2.671006000  | 1.167176000  | 1.811295000  |
| H  | 1.915138000  | -0.193872000 | 2.627926000  |
| H  | 0.708117000  | -3.309285000 | 0.313010000  |
| H  | 0.280613000  | -1.914125000 | 1.299924000  |
| H  | -1.047687000 | -1.567155000 | -0.409388000 |
| H  | 4.835289000  | 0.858080000  | 1.665194000  |
| H  | 5.865105000  | 0.252992000  | 0.379509000  |
| H  | 4.646560000  | 1.663039000  | -1.287104000 |
| H  | 3.613399000  | 2.299917000  | -0.017831000 |
| H  | 5.623773000  | 3.227362000  | 1.157736000  |
| H  | 6.654031000  | 2.605946000  | -0.120562000 |
| H  | 5.466015000  | 4.068680000  | -1.796302000 |
| H  | 4.428974000  | 4.693882000  | -0.508315000 |
| H  | 6.165001000  | 5.031016000  | -0.487237000 |

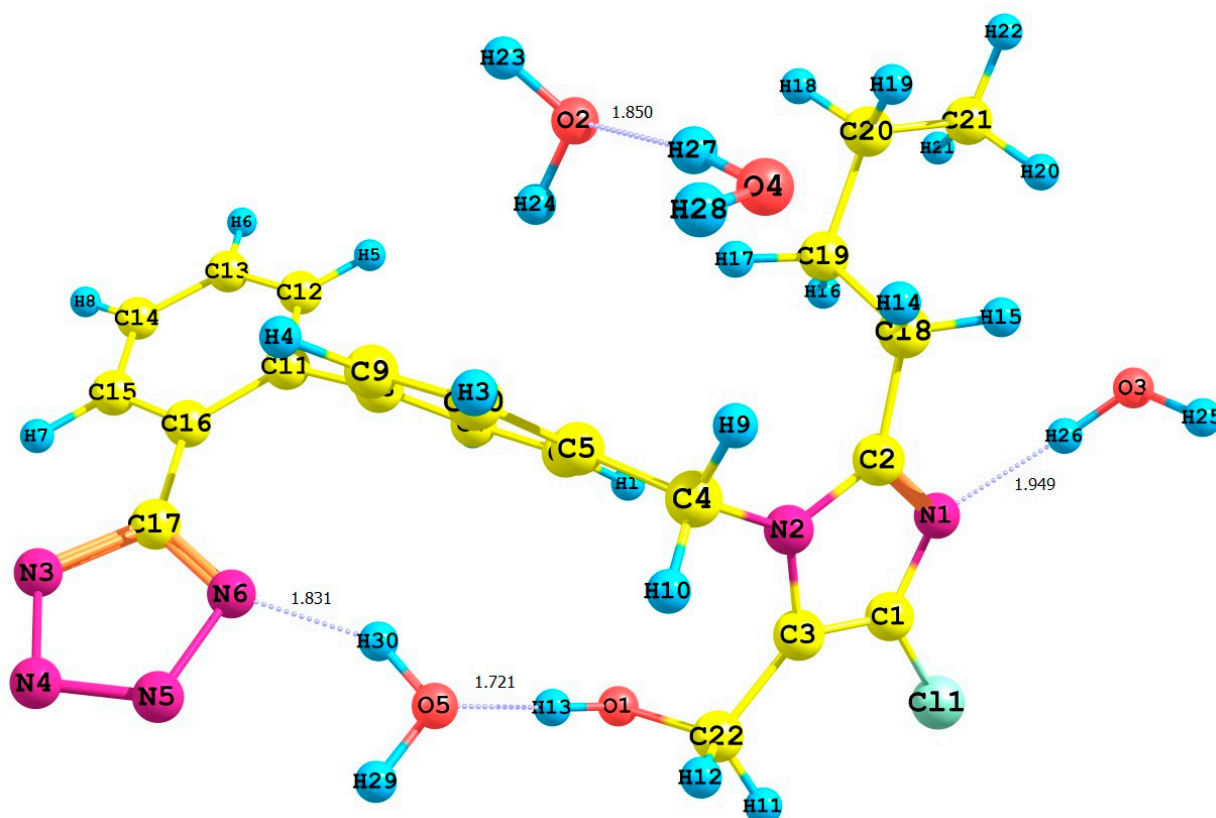

**Figure S15.** Optimized structure of the *anti*-losartan anion cluster **1** with water molecules (**XV**); interaction of **1** with three water molecules (B3LYP/6-31G(d,p) level of theory, gas).

Cartesian coordinates:

|   |              |              |              |
|---|--------------|--------------|--------------|
| C | -4.247043000 | -0.912515000 | 1.645576000  |
| N | -4.555092000 | 0.411155000  | 1.560187000  |
| C | -3.895002000 | 0.857151000  | 0.495765000  |
| N | -3.179290000 | -0.154165000 | -0.090878000 |
| C | -3.401567000 | -1.321615000 | 0.643629000  |
| C | -2.394833000 | -0.060903000 | -1.319404000 |
| C | -0.909467000 | 0.202054000  | -1.150464000 |
| C | -0.243758000 | 0.153126000  | 0.073399000  |
| C | 1.148408000  | 0.269599000  | 0.122963000  |
| C | 1.908939000  | 0.415911000  | -1.041220000 |
| C | 1.229476000  | 0.518335000  | -2.265991000 |
| C | -0.157132000 | 0.414750000  | -2.317372000 |
| C | 3.398039000  | 0.453789000  | -0.992580000 |
| C | 4.011984000  | 1.527802000  | -0.329414000 |
| C | 5.397017000  | 1.662978000  | -0.279292000 |
| C | 6.194118000  | 0.703472000  | -0.907159000 |
| C | 5.604088000  | -0.378462000 | -1.550029000 |
| C | 4.204971000  | -0.540591000 | -1.602001000 |
| C | 3.691684000  | -1.756232000 | -2.257827000 |



|    |              |              |              |
|----|--------------|--------------|--------------|
| N  | 4.477001000  | -2.536627000 | -3.026919000 |
| N  | 3.700541000  | -3.560584000 | -3.396931000 |
| N  | 2.493571000  | -3.413690000 | -2.872163000 |
| N  | 2.455995000  | -2.282996000 | -2.148016000 |
| C  | -3.946715000 | 2.283706000  | 0.041371000  |
| C  | -2.773109000 | 3.153168000  | 0.548577000  |
| C  | -3.018669000 | 4.654665000  | 0.324170000  |
| C  | -3.996317000 | 5.274284000  | 1.331997000  |
| C  | -2.791319000 | -2.661499000 | 0.346663000  |
| O  | -1.424061000 | -2.743658000 | 0.685304000  |
| Cl | -4.925980000 | -1.905687000 | 2.907792000  |
| H  | -0.799092000 | -0.036661000 | 0.984339000  |
| H  | 1.656760000  | 0.187300000  | 1.079045000  |
| H  | -0.663168000 | 0.446516000  | -3.279858000 |
| H  | 1.800323000  | 0.624581000  | -3.183300000 |
| H  | 3.377128000  | 2.276609000  | 0.137874000  |
| H  | 5.845581000  | 2.507644000  | 0.236864000  |
| H  | 6.209113000  | -1.142708000 | -2.025169000 |
| H  | 7.277561000  | 0.791596000  | -0.885546000 |
| H  | -2.834136000 | 0.720565000  | -1.947430000 |
| H  | -2.505792000 | -1.010595000 | -1.852851000 |
| H  | -3.362497000 | -3.395128000 | 0.931493000  |
| H  | -2.950399000 | -2.912530000 | -0.713144000 |
| H  | -0.905977000 | -2.824539000 | -0.153351000 |
| H  | -3.989863000 | 2.346729000  | -1.051798000 |
| H  | -4.885497000 | 2.678704000  | 0.438472000  |
| H  | -2.620103000 | 2.962167000  | 1.618638000  |
| H  | -1.851932000 | 2.852729000  | 0.039507000  |
| H  | -2.059369000 | 5.184330000  | 0.379215000  |
| H  | -3.384533000 | 4.806069000  | -0.700213000 |
| H  | -4.938722000 | 4.720555000  | 1.393948000  |
| H  | -3.563080000 | 5.273140000  | 2.339158000  |
| H  | -4.228759000 | 6.313779000  | 1.073152000  |
| O  | -0.544403000 | 3.525390000  | -2.307264000 |
| H  | 0.133346000  | 3.919214000  | -2.870714000 |
| H  | -0.182475000 | 2.656082000  | -2.060751000 |
| O  | -6.416601000 | 2.468622000  | 2.376039000  |
| H  | -7.139381000 | 2.150032000  | 1.821231000  |
| H  | -5.769197000 | 1.733214000  | 2.318724000  |
| O  | -3.023978000 | 2.680420000  | -3.354455000 |
| H  | -2.184623000 | 3.063994000  | -3.027064000 |
| H  | -2.768496000 | 2.186576000  | -4.142880000 |

|   |              |              |              |
|---|--------------|--------------|--------------|
| O | -0.195116000 | -2.845784000 | -1.720950000 |
| H | 0.081349000  | -3.690910000 | -2.104193000 |
| H | 0.680393000  | -2.377880000 | -1.710230000 |

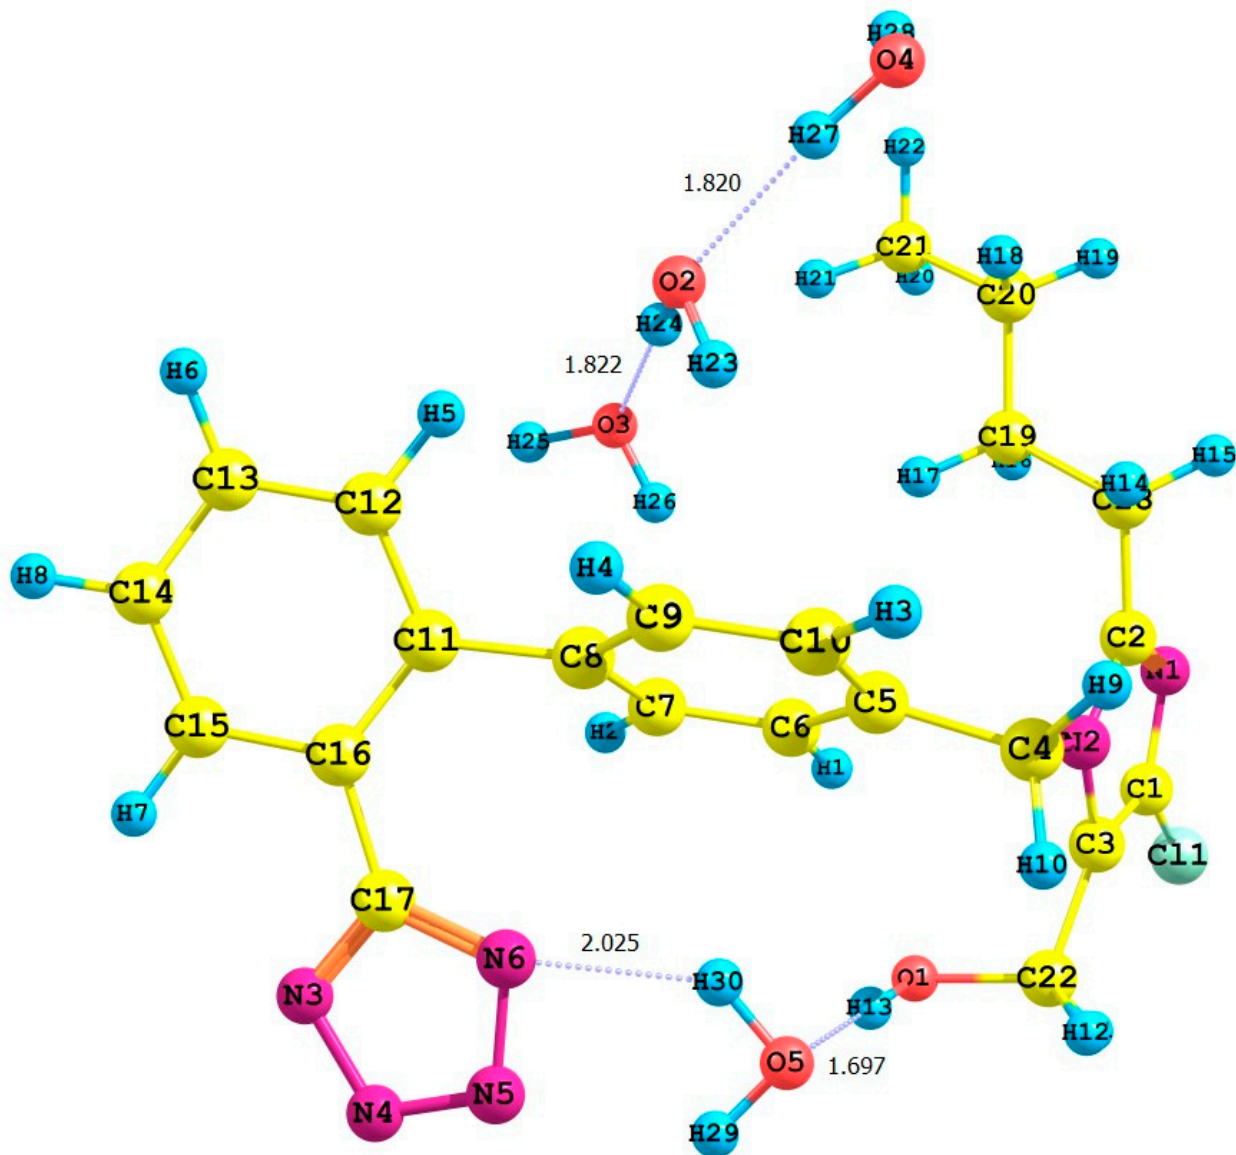

**Figure S16.** Optimized structure of the *anti*-losartan anion cluster **1** with water molecules (**XVI**); interaction of **1** with three water molecules (PBE1PBE/6-31G(d,p) level of theory, gas).

Cartesian coordinates:

|   |              |              |              |
|---|--------------|--------------|--------------|
| C | -4.913755000 | -1.457907000 | 0.962138000  |
| N | -5.121094000 | -0.124155000 | 0.854451000  |
| C | -4.299648000 | 0.265787000  | -0.101974000 |
| N | -3.585627000 | -0.785124000 | -0.605753000 |
| C | -3.973158000 | -1.926778000 | 0.080043000  |
| C | -2.665107000 | -0.749149000 | -1.724137000 |
| C | -1.262221000 | -0.291341000 | -1.410256000 |
| C | -0.654115000 | -0.592548000 | -0.188876000 |

|    |              |              |              |
|----|--------------|--------------|--------------|
| C  | 0.704395000  | -0.361356000 | -0.011791000 |
| C  | 1.490206000  | 0.174061000  | -1.040817000 |
| C  | 0.861632000  | 0.534041000  | -2.235188000 |
| C  | -0.500955000 | 0.302994000  | -2.416248000 |
| C  | 2.951293000  | 0.357133000  | -0.861837000 |
| C  | 3.471927000  | 1.655856000  | -0.957087000 |
| C  | 4.820539000  | 1.911530000  | -0.733728000 |
| C  | 5.668221000  | 0.852486000  | -0.416104000 |
| C  | 5.172350000  | -0.441479000 | -0.356088000 |
| C  | 3.816357000  | -0.725837000 | -0.586695000 |
| C  | 3.407036000  | -2.134562000 | -0.569173000 |
| N  | 4.216952000  | -3.108454000 | -0.122559000 |
| N  | 3.535552000  | -4.231489000 | -0.296288000 |
| N  | 2.364523000  | -3.954808000 | -0.830664000 |
| N  | 2.250361000  | -2.642411000 | -1.018693000 |
| C  | -4.124305000 | 1.690532000  | -0.510317000 |
| C  | -3.221605000 | 2.467821000  | 0.456204000  |
| C  | -3.149719000 | 3.957908000  | 0.144826000  |
| C  | -2.290505000 | 4.718702000  | 1.148355000  |
| C  | -3.351117000 | -3.275837000 | -0.086358000 |
| O  | -2.062263000 | -3.342712000 | 0.462316000  |
| Cl | -5.792931000 | -2.403670000 | 2.111289000  |
| H  | -1.225639000 | -1.093583000 | 0.587230000  |
| H  | 1.185358000  | -0.674582000 | 0.910983000  |
| H  | -0.964047000 | 0.545894000  | -3.370745000 |
| H  | 1.457776000  | 0.945769000  | -3.045294000 |
| H  | 2.795988000  | 2.469986000  | -1.215666000 |
| H  | 5.201700000  | 2.926245000  | -0.808559000 |
| H  | 5.822198000  | -1.283312000 | -0.138702000 |
| H  | 6.724108000  | 1.032949000  | -0.231433000 |
| H  | -3.097393000 | -0.126801000 | -2.514447000 |
| H  | -2.605198000 | -1.766123000 | -2.126165000 |
| H  | -4.013083000 | -3.986342000 | 0.427003000  |
| H  | -3.349058000 | -3.567032000 | -1.148600000 |
| H  | -1.402457000 | -3.450733000 | -0.267173000 |
| H  | -3.724453000 | 1.762370000  | -1.528413000 |
| H  | -5.117589000 | 2.152669000  | -0.523297000 |
| H  | -3.602109000 | 2.314694000  | 1.473943000  |
| H  | -2.212949000 | 2.034640000  | 0.433687000  |
| H  | -2.749163000 | 4.121407000  | -0.863864000 |
| H  | -4.167909000 | 4.372280000  | 0.144118000  |
| H  | -2.682652000 | 4.617971000  | 2.166824000  |

|   |              |              |              |
|---|--------------|--------------|--------------|
| H | -1.261504000 | 4.343234000  | 1.154916000  |
| H | -2.254806000 | 5.789308000  | 0.916141000  |
| O | 0.568187000  | 3.691958000  | -1.440843000 |
| H | 0.302360000  | 2.848996000  | -1.828095000 |
| H | 0.662623000  | 3.478899000  | -0.490593000 |
| O | 1.028791000  | 2.676783000  | 1.103552000  |
| H | 1.967571000  | 2.478042000  | 0.992338000  |
| H | 0.607705000  | 1.814084000  | 0.983549000  |
| O | -1.346403000 | 5.528884000  | -2.319008000 |
| H | -0.637259000 | 4.925602000  | -2.023136000 |
| H | -1.495874000 | 6.082737000  | -1.548476000 |
| O | -0.313609000 | -3.587556000 | -1.561525000 |
| H | 0.336576000  | -4.276886000 | -1.334040000 |
| H | 0.301835000  | -2.829064000 | -1.535962000 |

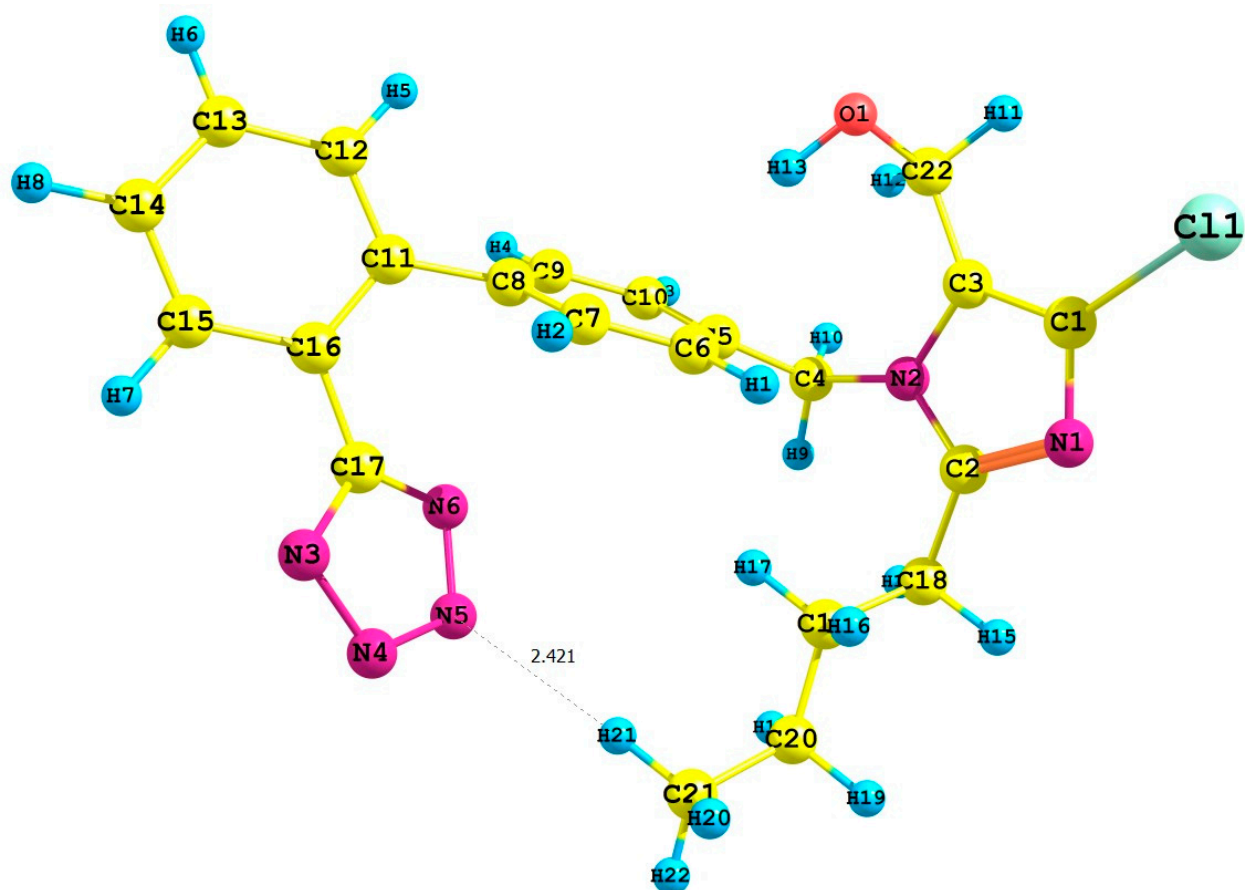

**Figure S17.** Optimized structure of the *syn*-losartan anion **1** (MP2/6-31G(d,p)/gas level of theory, Rotamer **XVII**).

Cartesian coordinates:

|   |              |              |              |
|---|--------------|--------------|--------------|
| C | -4.388726000 | -1.523290000 | 0.809352000  |
| N | -4.649729000 | -0.191416000 | 0.838852000  |
| C | -3.914850000 | 0.317147000  | -0.157385000 |

|    |              |              |              |
|----|--------------|--------------|--------------|
| N  | -3.213619000 | -0.668889000 | -0.804015000 |
| C  | -3.505312000 | -1.878475000 | -0.195647000 |
| C  | -2.294466000 | -0.498655000 | -1.918360000 |
| C  | -0.859618000 | -0.763215000 | -1.538971000 |
| C  | -0.393661000 | -0.467136000 | -0.248735000 |
| C  | 0.965808000  | -0.540102000 | 0.035760000  |
| C  | 1.888725000  | -0.877336000 | -0.965385000 |
| C  | 1.412596000  | -1.239079000 | -2.230658000 |
| C  | 0.049561000  | -1.174984000 | -2.517728000 |
| C  | 3.337078000  | -0.828565000 | -0.679892000 |
| C  | 4.117276000  | -1.983833000 | -0.826802000 |
| C  | 5.474477000  | -1.977310000 | -0.506461000 |
| C  | 6.059263000  | -0.801650000 | -0.026722000 |
| C  | 5.299196000  | 0.359464000  | 0.096346000  |
| C  | 3.932567000  | 0.373962000  | -0.231953000 |
| C  | 3.185509000  | 1.627796000  | -0.127310000 |
| N  | 3.489777000  | 2.586111000  | 0.779425000  |
| N  | 2.604676000  | 3.574773000  | 0.532045000  |
| N  | 1.807976000  | 3.212004000  | -0.502884000 |
| N  | 2.157352000  | 1.981165000  | -0.935841000 |
| C  | -3.819764000 | 1.772825000  | -0.476265000 |
| C  | -2.538651000 | 2.440375000  | 0.043037000  |
| C  | -2.507020000 | 3.941079000  | -0.230148000 |
| C  | -1.278987000 | 4.616342000  | 0.372165000  |
| C  | -2.871074000 | -3.177080000 | -0.555851000 |
| O  | -1.662186000 | -3.455886000 | 0.145577000  |
| Cl | -5.143051000 | -2.613844000 | 1.913928000  |
| H  | -1.093030000 | -0.171302000 | 0.524251000  |
| H  | 1.329432000  | -0.271079000 | 1.019788000  |
| H  | -0.307209000 | -1.419015000 | -3.513450000 |
| H  | 2.120784000  | -1.510704000 | -3.004731000 |
| H  | 3.639948000  | -2.897235000 | -1.165977000 |
| H  | 6.063574000  | -2.880574000 | -0.613629000 |
| H  | 5.740358000  | 1.283152000  | 0.448899000  |
| H  | 7.111798000  | -0.786125000 | 0.232446000  |
| H  | -2.406863000 | 0.528784000  | -2.266526000 |
| H  | -2.606078000 | -1.152970000 | -2.736685000 |
| H  | -3.558873000 | -3.977195000 | -0.283868000 |
| H  | -2.720518000 | -3.227972000 | -1.641270000 |
| H  | -1.045280000 | -2.740117000 | -0.067550000 |
| H  | -3.915938000 | 1.940758000  | -1.553744000 |
| H  | -4.687961000 | 2.238985000  | -0.007335000 |

|   |              |             |              |
|---|--------------|-------------|--------------|
| H | -2.473419000 | 2.262795000 | 1.120361000  |
| H | -1.652874000 | 1.979828000 | -0.401549000 |
| H | -2.525470000 | 4.103994000 | -1.312140000 |
| H | -3.422344000 | 4.393720000 | 0.166298000  |
| H | -1.277774000 | 4.500917000 | 1.457042000  |
| H | -0.352927000 | 4.186682000 | -0.012364000 |
| H | -1.278073000 | 5.685027000 | 0.153706000  |

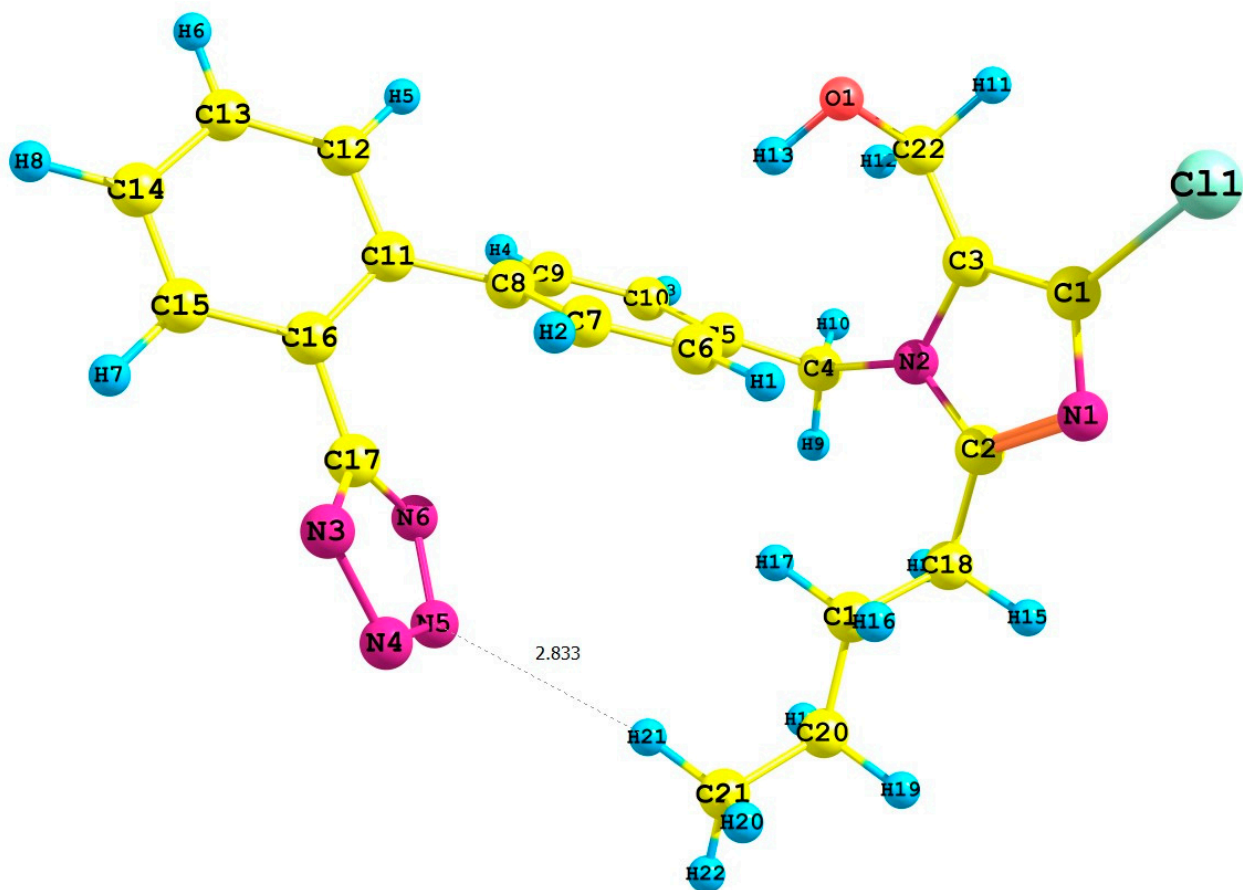

**Figure S18.** Optimized structure of the *syn*-losartan anion **1** (MP2/6-31G(d,p)/CPCM level of theory, Rotamer XVIII).

Cartesian coordinates:

|   |              |              |              |
|---|--------------|--------------|--------------|
| C | -4.226282000 | -1.537166000 | 0.933576000  |
| N | -4.563108000 | -0.221220000 | 0.940004000  |
| C | -3.916106000 | 0.297303000  | -0.112857000 |
| N | -3.193726000 | -0.666657000 | -0.765814000 |
| C | -3.381277000 | -1.871368000 | -0.109712000 |
| C | -2.329859000 | -0.479913000 | -1.923784000 |
| C | -0.870723000 | -0.658276000 | -1.577313000 |
| C | -0.386149000 | -0.335119000 | -0.299893000 |
| C | 0.977366000  | -0.414059000 | -0.024343000 |
| C | 1.889297000  | -0.789808000 | -1.023449000 |

|    |              |              |              |
|----|--------------|--------------|--------------|
| C  | 1.397600000  | -1.142686000 | -2.288110000 |
| C  | 0.031388000  | -1.073272000 | -2.563453000 |
| C  | 3.336893000  | -0.835390000 | -0.728113000 |
| C  | 4.062309000  | -2.010837000 | -0.973203000 |
| C  | 5.414562000  | -2.100739000 | -0.641395000 |
| C  | 6.057119000  | -1.010396000 | -0.048859000 |
| C  | 5.351567000  | 0.170919000  | 0.180945000  |
| C  | 3.995344000  | 0.278524000  | -0.160768000 |
| C  | 3.297425000  | 1.555516000  | 0.046054000  |
| N  | 3.317319000  | 2.238811000  | 1.212398000  |
| N  | 2.572775000  | 3.342258000  | 0.972944000  |
| N  | 2.132398000  | 3.312928000  | -0.305311000 |
| N  | 2.580138000  | 2.188754000  | -0.908226000 |
| C  | -3.922540000 | 1.744993000  | -0.476844000 |
| C  | -2.661647000 | 2.484042000  | -0.010967000 |
| C  | -2.682342000 | 3.970150000  | -0.350960000 |
| C  | -1.458348000 | 4.701908000  | 0.190019000  |
| C  | -2.699635000 | -3.147567000 | -0.462618000 |
| O  | -1.470892000 | -3.352963000 | 0.244531000  |
| Cl | -4.844620000 | -2.628713000 | 2.119601000  |
| H  | -1.075001000 | -0.043133000 | 0.483758000  |
| H  | 1.343921000  | -0.158878000 | 0.962706000  |
| H  | -0.334355000 | -1.336921000 | -3.549518000 |
| H  | 2.090276000  | -1.444612000 | -3.064922000 |
| H  | 3.550497000  | -2.865628000 | -1.400364000 |
| H  | 5.957630000  | -3.018426000 | -0.829239000 |
| H  | 5.848041000  | 1.030155000  | 0.615289000  |
| H  | 7.104407000  | -1.075322000 | 0.218567000  |
| H  | -2.513990000 | 0.524294000  | -2.305010000 |
| H  | -2.630587000 | -1.179118000 | -2.705432000 |
| H  | -3.346033000 | -3.975218000 | -0.174549000 |
| H  | -2.548128000 | -3.209741000 | -1.544101000 |
| H  | -0.867667000 | -2.652222000 | -0.042332000 |
| H  | -4.055774000 | 1.872972000  | -1.554232000 |
| H  | -4.799577000 | 2.181660000  | 0.003267000  |
| H  | -2.564998000 | 2.355353000  | 1.071149000  |
| H  | -1.775272000 | 2.027460000  | -0.459111000 |
| H  | -2.736428000 | 4.086790000  | -1.436617000 |
| H  | -3.591780000 | 4.419877000  | 0.056518000  |
| H  | -1.431294000 | 4.646275000  | 1.278921000  |
| H  | -0.534814000 | 4.261972000  | -0.187284000 |
| H  | -1.472935000 | 5.755110000  | -0.090096000 |

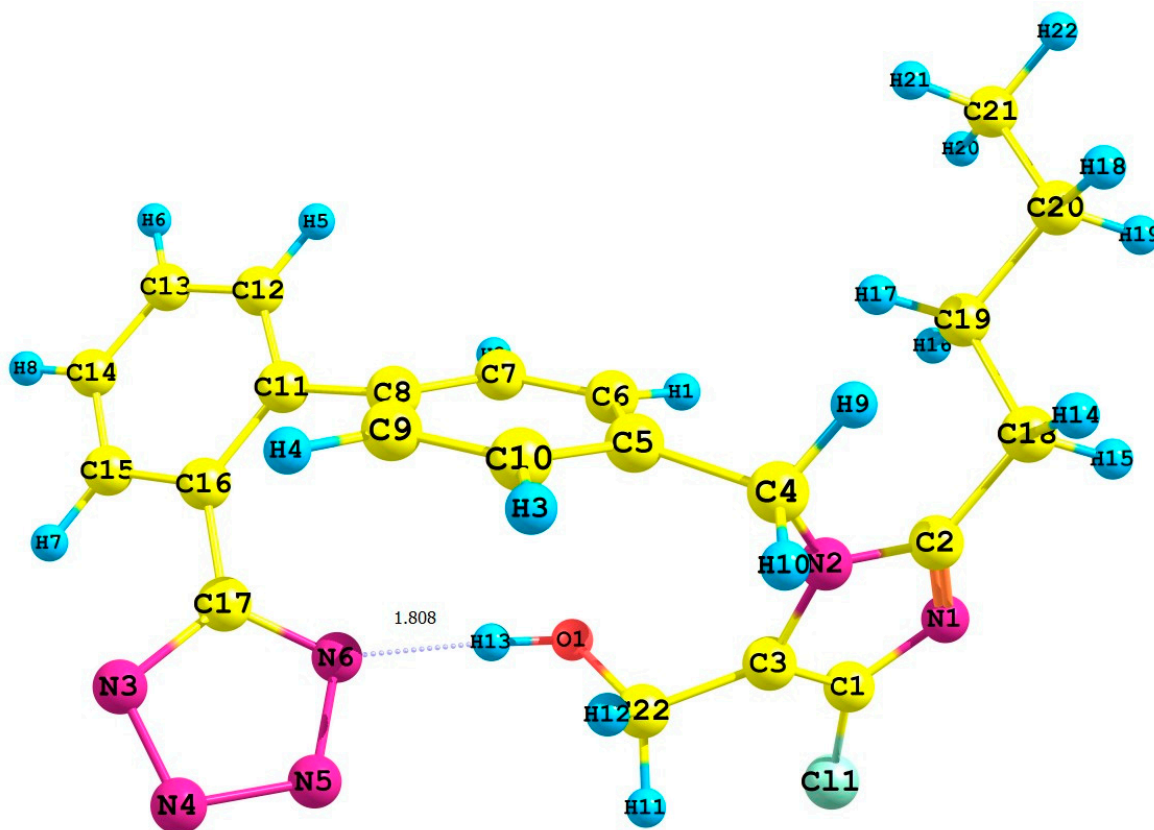

**Figure S19.** Optimized structure of the *anti*-losartan anion **1** (MP2/6-31G(d,p)/gas level of theory, Rotamer **XIX**).

Cartesian coordinates:

|   |              |              |              |
|---|--------------|--------------|--------------|
| C | -3.561015000 | -1.699491000 | 0.790478000  |
| N | -4.295867000 | -0.554958000 | 0.797180000  |
| C | -3.783572000 | 0.166189000  | -0.204600000 |
| N | -2.748636000 | -0.492946000 | -0.818913000 |
| C | -2.591485000 | -1.725286000 | -0.197538000 |
| C | -2.042918000 | -0.041817000 | -2.015885000 |
| C | -0.548929000 | -0.070045000 | -1.843312000 |
| C | 0.046054000  | 0.402516000  | -0.670654000 |
| C | 1.410391000  | 0.218374000  | -0.459050000 |
| C | 2.192087000  | -0.452054000 | -1.408078000 |
| C | 1.609464000  | -0.835891000 | -2.624629000 |
| C | 0.248818000  | -0.648607000 | -2.835976000 |
| C | 3.586156000  | -0.834370000 | -1.108426000 |
| C | 4.522156000  | 0.137407000  | -0.728534000 |
| C | 5.852386000  | -0.202780000 | -0.484569000 |
| C | 6.258397000  | -1.532571000 | -0.625340000 |
| C | 5.332013000  | -2.511879000 | -0.979051000 |
| C | 3.985852000  | -2.187313000 | -1.212754000 |
| C | 3.052002000  | -3.263075000 | -1.563864000 |



|    |              |              |              |
|----|--------------|--------------|--------------|
| N  | 3.393319000  | -4.271586000 | -2.396192000 |
| N  | 2.288697000  | -5.046789000 | -2.468903000 |
| N  | 1.317989000  | -4.520610000 | -1.693213000 |
| N  | 1.782668000  | -3.391517000 | -1.111050000 |
| C  | -4.225433000 | 1.552004000  | -0.539103000 |
| C  | -3.251088000 | 2.627805000  | -0.046049000 |
| C  | -3.730736000 | 4.045344000  | -0.339995000 |
| C  | -2.759608000 | 5.108760000  | 0.160660000  |
| C  | -1.499490000 | -2.711460000 | -0.465107000 |
| O  | -0.385598000 | -2.390555000 | 0.343229000  |
| Cl | -3.877458000 | -2.961569000 | 1.924060000  |
| H  | -0.572217000 | 0.816695000  | 0.117170000  |
| H  | 1.855093000  | 0.502115000  | 0.487763000  |
| H  | -0.209583000 | -1.014228000 | -3.749040000 |
| H  | 2.211088000  | -1.353398000 | -3.361872000 |
| H  | 4.200528000  | 1.170907000  | -0.656335000 |
| H  | 6.566072000  | 0.561834000  | -0.200692000 |
| H  | 5.626497000  | -3.548954000 | -1.078515000 |
| H  | 7.291518000  | -1.807102000 | -0.445888000 |
| H  | -2.411281000 | 0.961045000  | -2.235817000 |
| H  | -2.328631000 | -0.682949000 | -2.854067000 |
| H  | -1.896901000 | -3.707413000 | -0.234230000 |
| H  | -1.242836000 | -2.715352000 | -1.529277000 |
| H  | 0.423808000  | -2.723491000 | -0.122586000 |
| H  | -4.394353000 | 1.669352000  | -1.614372000 |
| H  | -5.192246000 | 1.685405000  | -0.051000000 |
| H  | -3.115763000 | 2.498568000  | 1.031223000  |
| H  | -2.267607000 | 2.475978000  | -0.500393000 |
| H  | -3.876734000 | 4.159511000  | -1.418050000 |
| H  | -4.710958000 | 4.194367000  | 0.121302000  |
| H  | -2.621718000 | 5.027491000  | 1.238941000  |
| H  | -1.782670000 | 4.990851000  | -0.308512000 |
| H  | -3.118996000 | 6.114432000  | -0.057812000 |

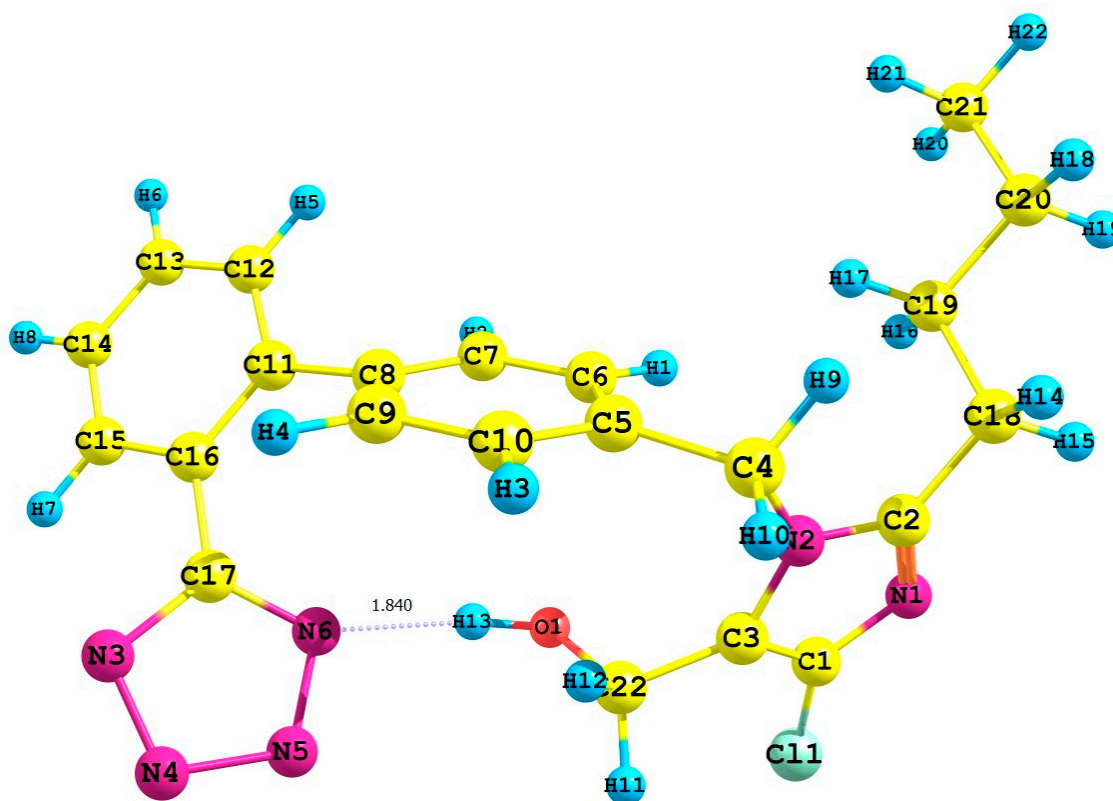

**Figure S20.** Optimized structure of the *anti*-losartan anion **1** (MP2/6-31G(d,p)/CPCM level of theory, Rotamer XX).

Cartesian coordinates:

|   |              |              |              |
|---|--------------|--------------|--------------|
| C | -3.547312000 | -1.693400000 | 0.754258000  |
| N | -4.264680000 | -0.540698000 | 0.796973000  |
| C | -3.769820000 | 0.193574000  | -0.208420000 |
| N | -2.760904000 | -0.470733000 | -0.856611000 |
| C | -2.606028000 | -1.713077000 | -0.258873000 |
| C | -2.053859000 | -0.001938000 | -2.050929000 |
| C | -0.561454000 | -0.083008000 | -1.873079000 |
| C | 0.045466000  | 0.401767000  | -0.709945000 |
| C | 1.406595000  | 0.197701000  | -0.493633000 |
| C | 2.177305000  | -0.503719000 | -1.431620000 |
| C | 1.583478000  | -0.908524000 | -2.636088000 |
| C | 0.224488000  | -0.700704000 | -2.852586000 |
| C | 3.580578000  | -0.856095000 | -1.134753000 |
| C | 4.499523000  | 0.146053000  | -0.790388000 |
| C | 5.836500000  | -0.159734000 | -0.535415000 |
| C | 6.271679000  | -1.484635000 | -0.623861000 |
| C | 5.364624000  | -2.494053000 | -0.944426000 |
| C | 4.014926000  | -2.199780000 | -1.195216000 |
| C | 3.101582000  | -3.311771000 | -1.499594000 |

|    |              |              |              |
|----|--------------|--------------|--------------|
| N  | 3.442332000  | -4.332226000 | -2.317195000 |
| N  | 2.374488000  | -5.159715000 | -2.309971000 |
| N  | 1.421133000  | -4.650590000 | -1.502930000 |
| N  | 1.864013000  | -3.485185000 | -0.980665000 |
| C  | -4.214436000 | 1.582723000  | -0.525451000 |
| C  | -3.242760000 | 2.655491000  | -0.018848000 |
| C  | -3.742254000 | 4.071894000  | -0.283248000 |
| C  | -2.774936000 | 5.134963000  | 0.224726000  |
| C  | -1.554771000 | -2.725690000 | -0.565717000 |
| O  | -0.454040000 | -2.543902000 | 0.318556000  |
| Cl | -3.841224000 | -2.970963000 | 1.881132000  |
| H  | -0.557441000 | 0.878587000  | 0.054320000  |
| H  | 1.863390000  | 0.523075000  | 0.434049000  |
| H  | -0.238642000 | -1.056336000 | -3.766584000 |
| H  | 2.179733000  | -1.426330000 | -3.378074000 |
| H  | 4.160558000  | 1.174915000  | -0.750380000 |
| H  | 6.533344000  | 0.628689000  | -0.280083000 |
| H  | 5.687537000  | -3.526587000 | -0.991839000 |
| H  | 7.308133000  | -1.731688000 | -0.430866000 |
| H  | -2.384593000 | 1.019145000  | -2.235090000 |
| H  | -2.366860000 | -0.606215000 | -2.904420000 |
| H  | -2.002363000 | -3.717526000 | -0.431944000 |
| H  | -1.249711000 | -2.648920000 | -1.610972000 |
| H  | 0.372155000  | -2.786860000 | -0.160664000 |
| H  | -4.380577000 | 1.705087000  | -1.598913000 |
| H  | -5.183057000 | 1.713727000  | -0.040715000 |
| H  | -3.093447000 | 2.511444000  | 1.054967000  |
| H  | -2.264264000 | 2.524525000  | -0.489906000 |
| H  | -3.901307000 | 4.200392000  | -1.357097000 |
| H  | -4.717172000 | 4.201186000  | 0.193891000  |
| H  | -2.623175000 | 5.036762000  | 1.299781000  |
| H  | -1.803756000 | 5.037034000  | -0.260878000 |
| H  | -3.149994000 | 6.138764000  | 0.027997000  |

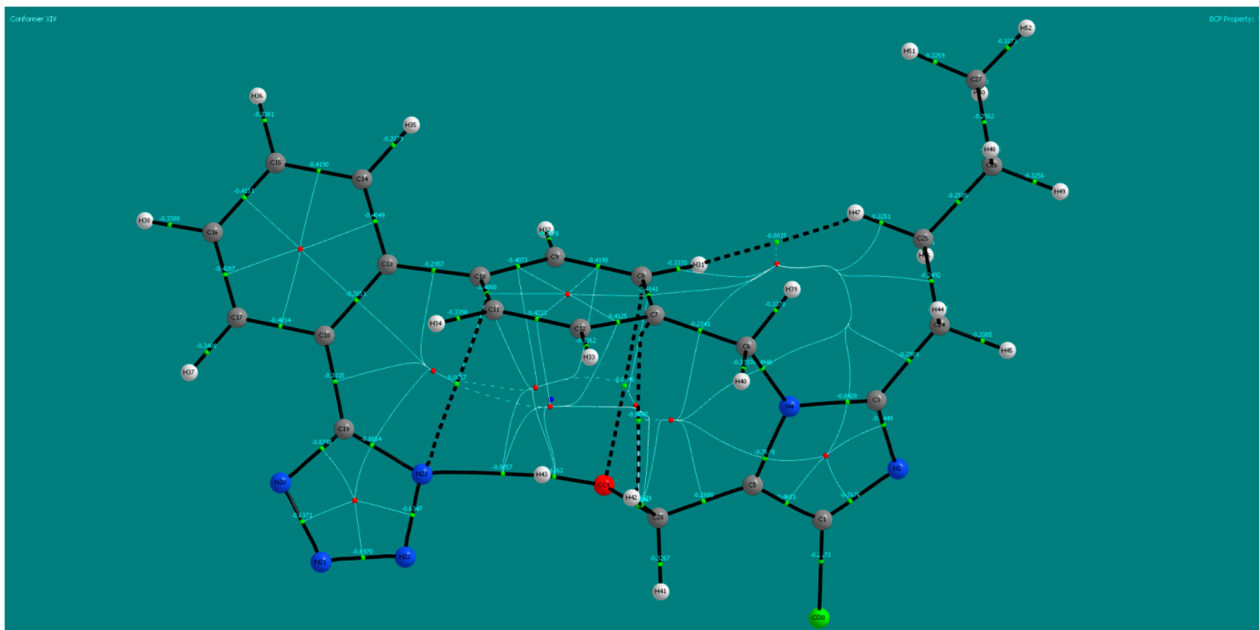

**Figure S21.** Results of QTAIM (quantum theory of atoms-in-molecules) calculations of the *anti*-losartan anion **1** (PBE1PBE/6-31G(d,p)/CPCM level of theory, Rotamer **XIV**).

**Table S19.** Data extracted from the *sumviz* type of file (QTAIM calculations).

| BCP No. | Name  | Atoms   | Rho      | DelSqRho | Ellipticity | K        |
|---------|-------|---------|----------|----------|-------------|----------|
| 1       | BCP1  | C1–N2   | 0.338539 | –1.11326 | 0.248911    | 0.522973 |
| 2       | BCP2  | N2–C3   | 0.356886 | –1.01807 | 0.287978    | 0.599693 |
| 3       | BCP3  | N4–C5   | 0.295841 | –0.60569 | 0.207922    | 0.459635 |
| 4       | BCP4  | C3–N4   | 0.314094 | –0.66426 | 0.230813    | 0.504429 |
| 5       | BCP5  | C1–C5   | 0.325362 | –0.88639 | 0.413812    | 0.343367 |
| 6       | BCP6  | N4–C6   | 0.256977 | –0.70186 | 0.025562    | 0.335154 |
| 7       | BCP7  | C6–C7   | 0.257584 | –0.62475 | 0.044061    | 0.215149 |
| 8       | BCP8  | C7–C8   | 0.311528 | –0.8467  | 0.20875     | 0.312909 |
| 9       | BCP9  | C8–C9   | 0.313449 | –0.86124 | 0.212157    | 0.317552 |
| 10      | BCP10 | C9–C10  | 0.308815 | –0.83277 | 0.207404    | 0.307755 |
| 11      | BCP11 | C7–C12  | 0.311001 | –0.84327 | 0.214707    | 0.311675 |
| 12      | BCP12 | C10–C11 | 0.309353 | –0.83724 | 0.202807    | 0.308656 |
| 13      | BCP13 | C6–H40  | 0.28342  | –1.01651 | 0.03347     | 0.293928 |
| 14      | BCP14 | C7–H42  | 0.009099 | 0.032679 | 2.37448     | –0.00172 |
| 15      | BCP15 | C11–C12 | 0.314457 | –0.86662 | 0.214575    | 0.319494 |
| 16      | BCP16 | C13–C14 | 0.307738 | –0.82496 | 0.212194    | 0.305571 |
| 17      | BCP17 | C10–C13 | 0.268187 | –0.6715  | 0.048524    | 0.231774 |
| 18      | BCP18 | C15–H36 | 0.283952 | –1.02516 | 0.014542    | 0.297183 |
| 19      | BCP19 | C14–C15 | 0.313393 | –0.86175 | 0.209923    | 0.31722  |
| 20      | BCP20 | C15–C16 | 0.312137 | –0.85649 | 0.202544    | 0.314592 |
| 21      | BCP21 | C13–C18 | 0.300063 | –0.78219 | 0.205177    | 0.290331 |
| 22      | BCP22 | C16–H38 | 0.283903 | –1.02449 | 0.014445    | 0.297038 |
| 23      | BCP23 | C16–C17 | 0.314045 | –0.86446 | 0.21056     | 0.31841  |
| 24      | BCP24 | C11–N23 | 0.010037 | 0.032678 | 1.130845    | –0.00125 |
| 25      | BCP25 | C17–H37 | 0.285579 | –1.04155 | 0.01604     | 0.300598 |

Table S19. *Cont.*

| BCP No.   | Name         | Atoms          | Rho             | DelSqRho        | Ellipticity     | K              |
|-----------|--------------|----------------|-----------------|-----------------|-----------------|----------------|
| 26        | BCP26        | C17–C18        | 0.306919        | −0.82336        | 0.202169        | 0.303635       |
| 27        | BCP27        | C18–C19        | 0.270951        | −0.69083        | 0.097104        | 0.237081       |
| 28        | BCP28        | C19–N23        | 0.34381         | −1.00907        | 0.221963        | 0.55885        |
| 29        | BCP29        | C19–N20        | 0.349835        | −1.07069        | 0.227916        | 0.571074       |
| 30        | BCP30        | N20–N21        | 0.390047        | −0.78742        | 0.111266        | 0.416954       |
| 31        | BCP31        | N22–N23        | 0.38917         | −0.78375        | 0.124609        | 0.415327       |
| 32        | BCP32        | N21–N22        | 0.413605        | −0.88451        | 0.168266        | 0.459056       |
| 33        | BCP33        | C3–C24         | 0.261819        | −0.65068        | 0.053432        | 0.226758       |
| 34        | BCP34        | H31–H47        | 0.003696        | 0.012698        | 0.087341        | −0.00084       |
| 35        | BCP35        | C24–C25        | 0.241004        | −0.54169        | 0.018346        | 0.192288       |
| 36        | BCP36        | C25–H47        | 0.275048        | −0.92991        | 0.007341        | 0.278806       |
| 37        | BCP37        | C26–H49        | 0.2754          | −0.93331        | 0.005084        | 0.279455       |
| 38        | BCP38        | C25–C26        | 0.247302        | −0.571          | 0.015898        | 0.200634       |
| 39        | BCP39        | C26–C27        | 0.245993        | −0.56704        | 0.006224        | 0.198997       |
| 40        | BCP40        | C5–C28         | 0.262419        | −0.65696        | 0.004286        | 0.226131       |
| 41        | BCP41        | C8–O29         | 0.007455        | 0.024427        | 2.098968        | −0.00077       |
| <b>42</b> | <b>BCP42</b> | <b>N23–H43</b> | <b>0.038172</b> | <b>0.092778</b> | <b>0.035852</b> | <b>0.00124</b> |
| 43        | BCP43        | C28–O29        | 0.268979        | −0.58425        | 0.055585        | 0.390307       |
| 44        | BCP44        | C1–Cl30        | 0.202695        | −0.32282        | 0.080286        | 0.149008       |
| 45        | BCP45        | C8–H31         | 0.283224        | −1.01885        | 0.014072        | 0.295878       |
| 46        | BCP46        | C9–H32         | 0.283703        | −1.02258        | 0.017135        | 0.296711       |
| 47        | BCP47        | C12–H33        | 0.282726        | −1.01382        | 0.016335        | 0.294815       |
| 48        | BCP48        | C11–H34        | 0.284446        | −1.02933        | 0.01513         | 0.298143       |
| 49        | BCP49        | C14–H35        | 0.28375         | −1.02225        | 0.017544        | 0.296717       |
| 50        | BCP50        | C6–H39         | 0.284102        | −1.02426        | 0.028876        | 0.29654        |
| 51        | BCP51        | C28–H41        | 0.280105        | −0.98221        | 0.041204        | 0.28612        |
| 52        | BCP52        | C28–H42        | 0.283069        | −1.00893        | 0.035947        | 0.292572       |
| 53        | BCP53        | O29–H43        | 0.335798        | −1.95476        | 0.024855        | 0.562452       |
| 54        | BCP54        | C24–H44        | 0.275791        | −0.94265        | 0.01123         | 0.280699       |
| 55        | BCP55        | C24–H45        | 0.278757        | −0.97037        | 0.008075        | 0.286559       |
| 56        | BCP56        | C25–H46        | 0.276297        | −0.94282        | 0.006423        | 0.28104        |
| 57        | BCP57        | C26–H48        | 0.275351        | −0.93281        | 0.005002        | 0.279364       |
| 58        | BCP58        | C27–H50        | 0.274798        | −0.93357        | 0.006738        | 0.279685       |
| 59        | BCP59        | C27–H51        | 0.274768        | −0.93325        | 0.006732        | 0.27963        |
| 60        | BCP60        | C27–H52        | 0.275481        | −0.94027        | 0.006981        | 0.281201       |

In this table, the N6<sub>tetrazole</sub>···HO-CH<sub>2</sub>-imidazole type of interactions within the structure of Rotamer **XIV** (isomer *anti*) are marked.

Number of electrons (from occupied molecular orbitals) = 222.0000000000

Number of alpha electrons (from occupied molecular orbitals) = 111.0000000000

Number of beta electrons (from MO Occs) = 111.0000000000

Number of electron pairs ( $N \times (N - 1)/2$ ) = 24,531.0000000000

Number of electron pairs = 24,531.0000000000

Number of NACPs = 52



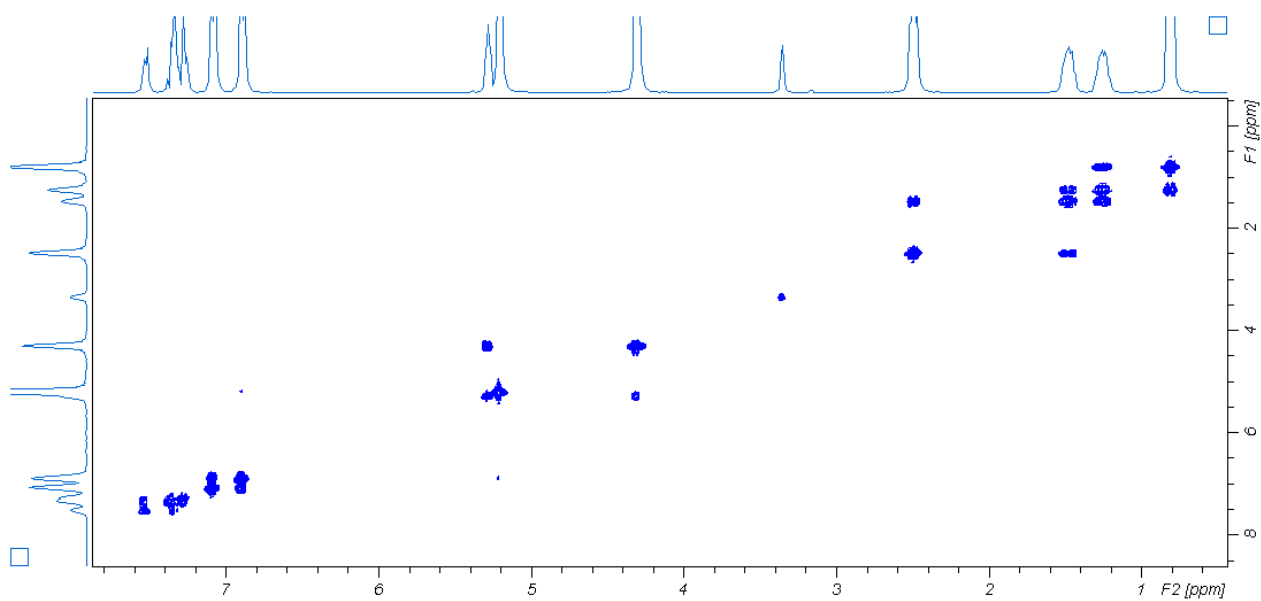

**Figure S24.** The  $^1\text{H}$ - $^1\text{H}$  COSY spectrum of Losartan **1** recorded at 293 K.

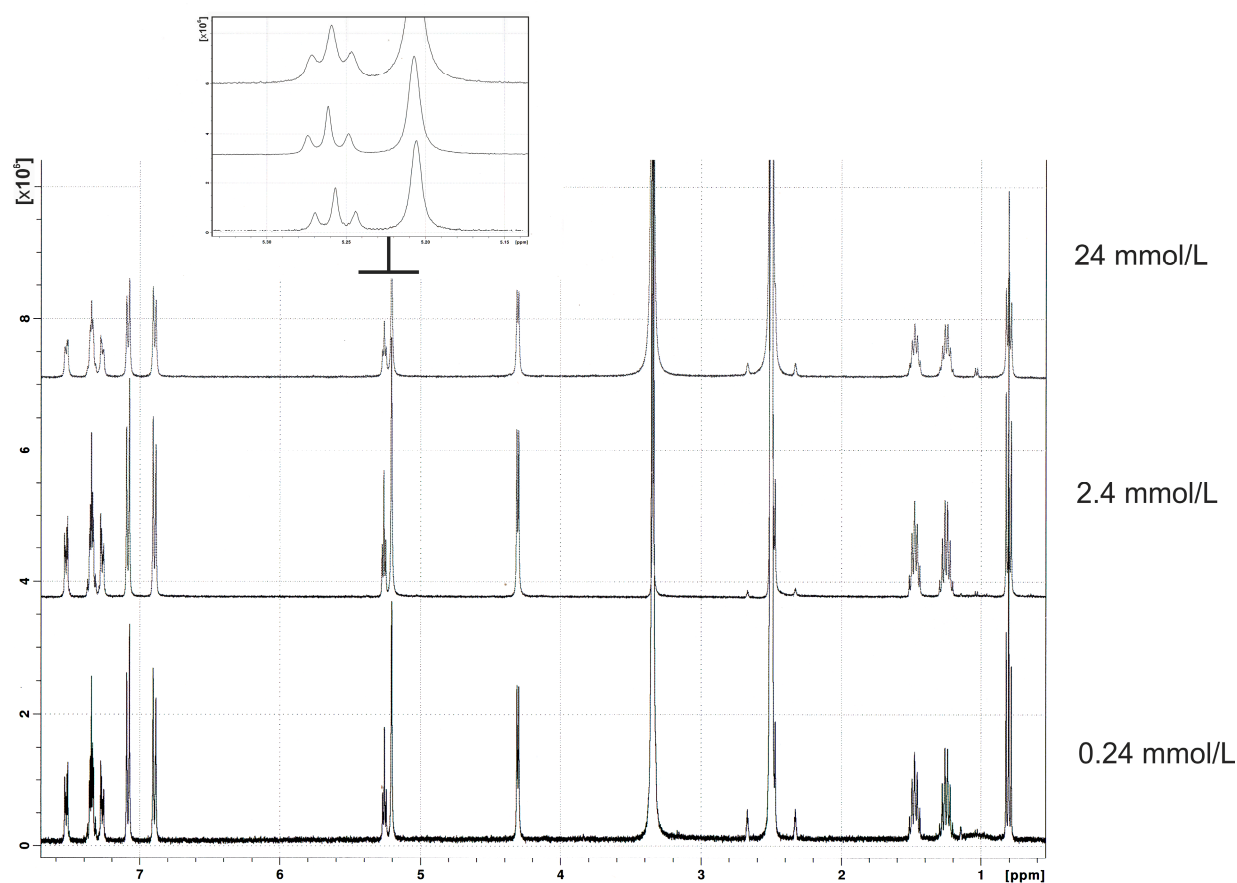

**Figure S25.** The imposition of experimental  $^1\text{H}$  NMR spectra of Losartan **1** recorded at three different concentrations.
